# Supplementary material for: Preparation of dendritic carboranyl glycoconjugates as potential anticancer therapeutics
Source: Royal Society of Chemistry journal article supplement (doi:10.1039/d0ra07264h), 2020-01-01

## Supplementary information for:

# Preparation of dendritic carboranyl glycoconjugates as potential anticancer therapeutics

Biswa Ranjan Swain,<sup>a,b</sup> Chandra Sekhara Mahanta,<sup>a</sup> Bibhuti Bhusan Jena,<sup>a</sup> Swaraj Kumar Beriha,<sup>b</sup> Bismita Nayak,<sup>c</sup> Rashmirekha Satapathy,<sup>a\*</sup> and Barada P. Dash<sup>b\*</sup>

<sup>a</sup>*Department of Chemistry, Ravenshaw University, Cuttack, Odisha, 753 003, India. E-mail: rashmi.satapathy@gmail.com; rashmi@ravenshawuniversity.ac.in*

<sup>b</sup>*Department of Chemistry, Siksha 'O' Anusandhan (Deemed to be University), Bhubaneswar, Odisha, 751030, India. E-mail: barada.dash@gmail.com; baradadash@soa.ac.in*

<sup>c</sup>*Department of Life Science, National Institute of Technology, Rourkela, Odisha, 769 008, India*

---

| <b>Contents</b>                | <b>Page No.</b> |
|--------------------------------|-----------------|
| NMR spectra of compounds.....  | 2               |
| Mass spectra of compounds..... | 23              |

## NMR Spectra

$^1\text{H}$  NMR of Compound 4:

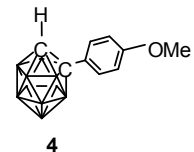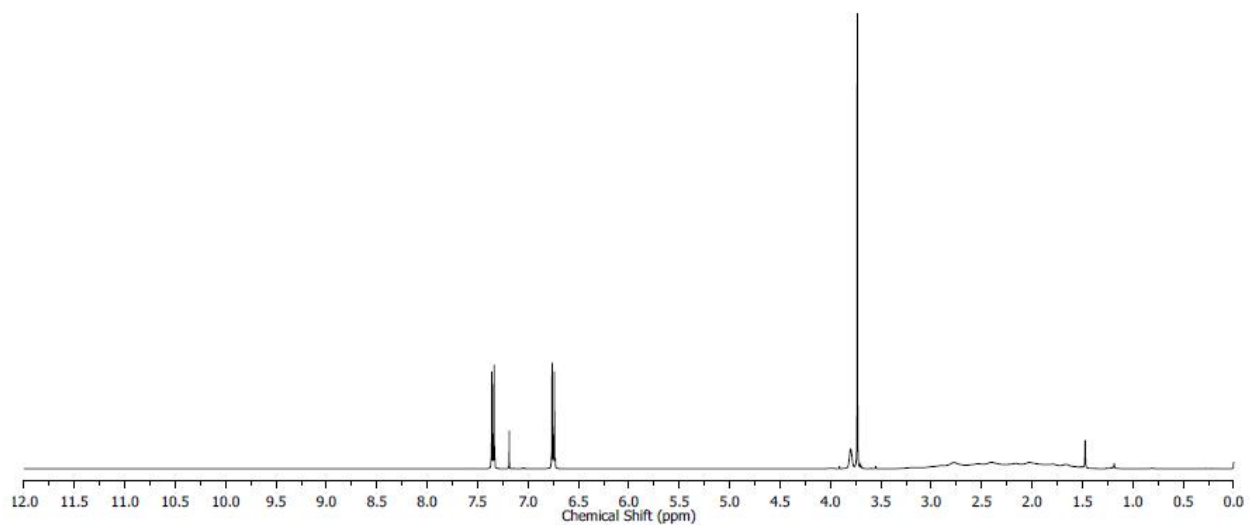

$^{13}\text{C}$   $\{^1\text{H}\}$  NMR of Compound 4:

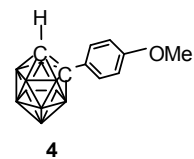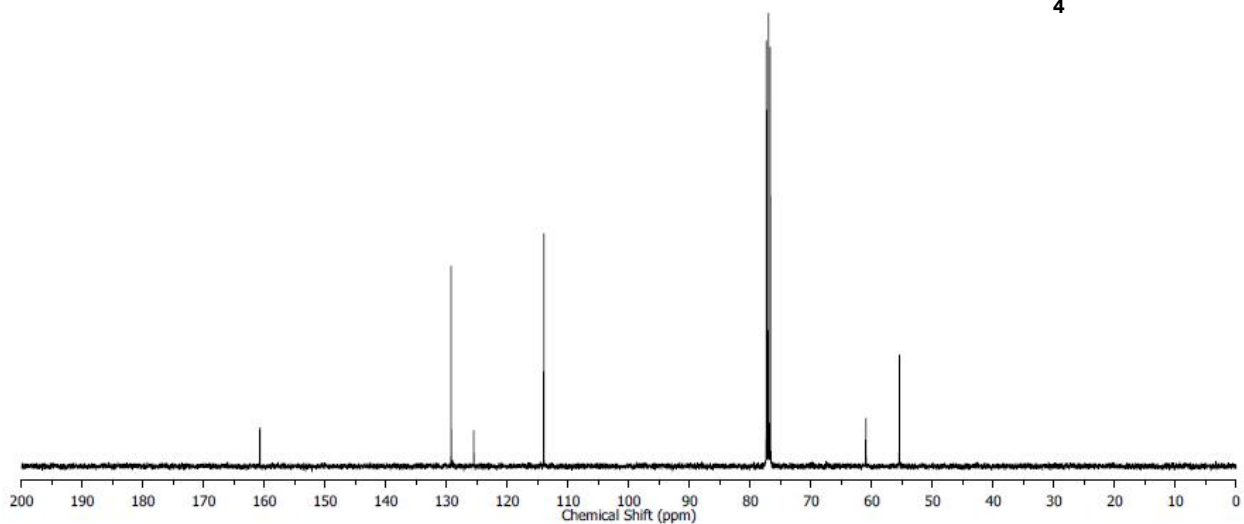

$^{11}\text{B}\{^1\text{H}\}$  NMR of Compound 4:

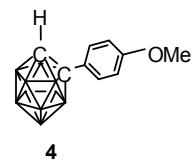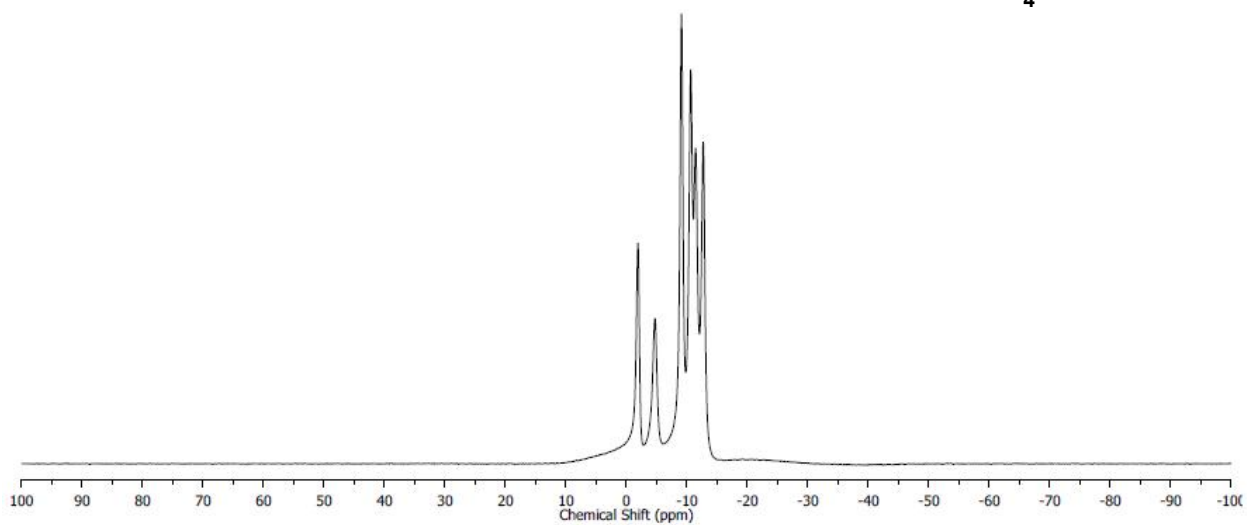

$^1\text{H}$  NMR of Compound 5:

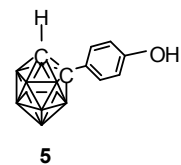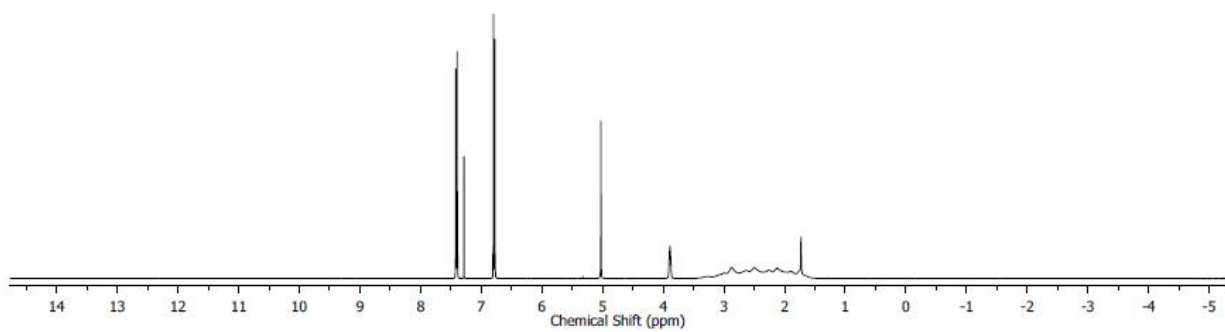

$^{13}\text{C} \{^1\text{H}\}$  NMR of Compound 5:

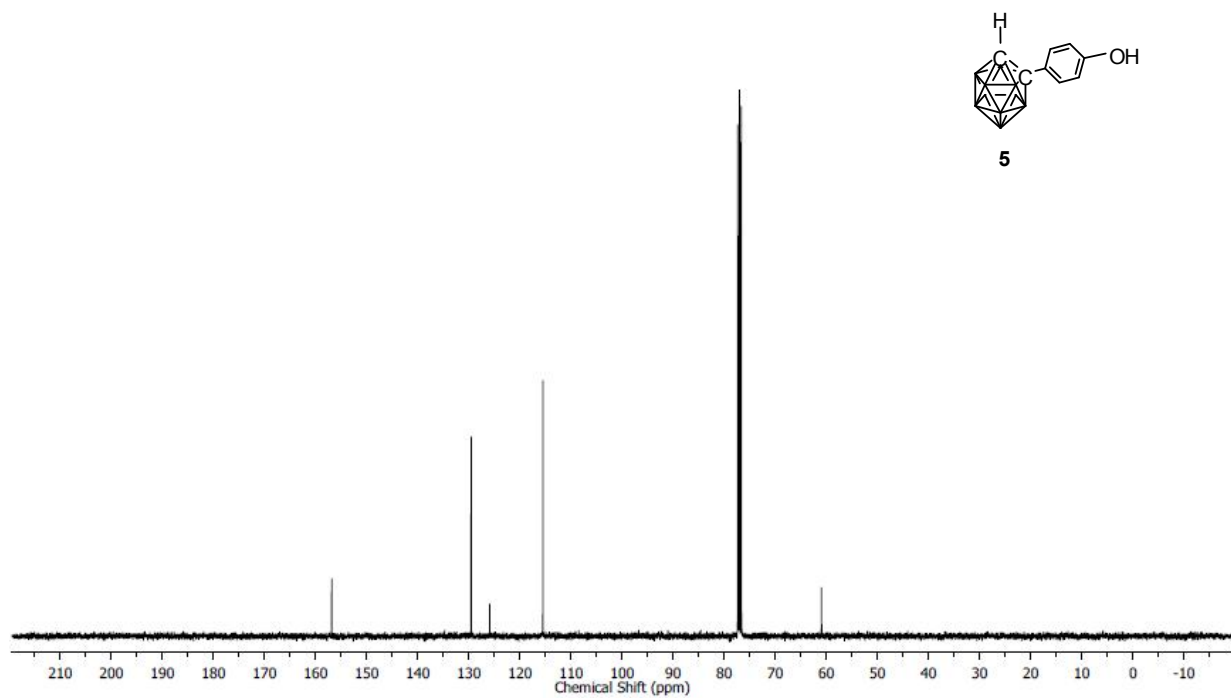

$^{11}\text{B} \{^1\text{H}\}$  NMR of Compound 5:

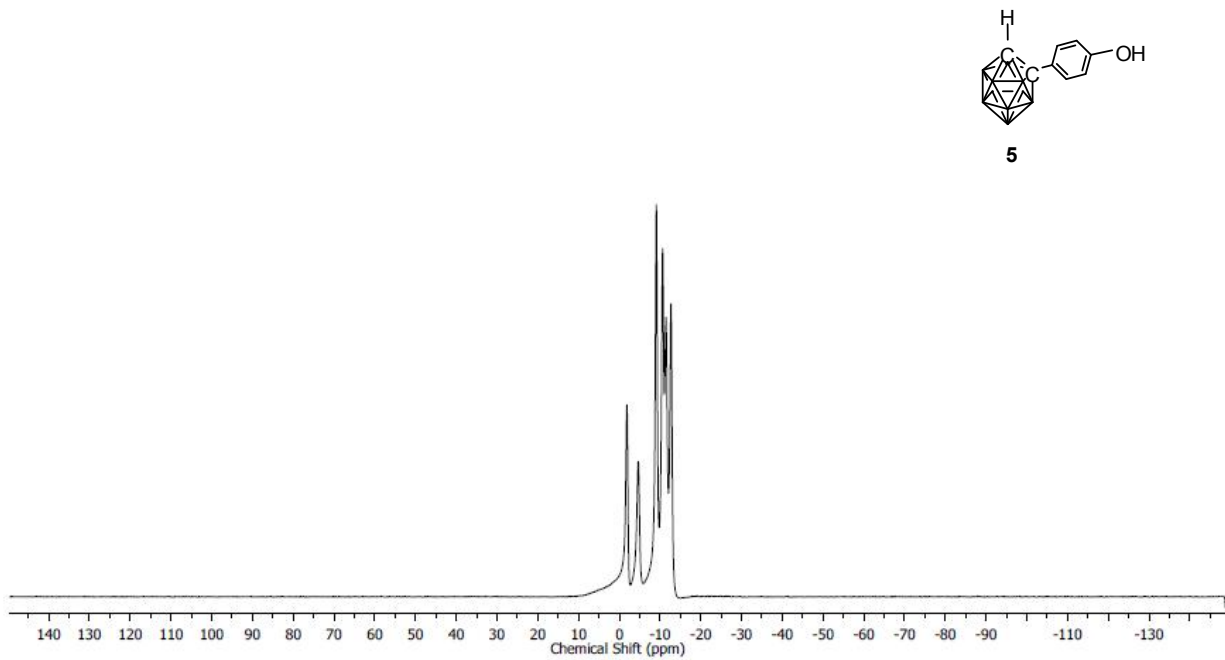

$^1\text{H}$  NMR of Compound 7:

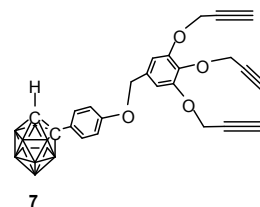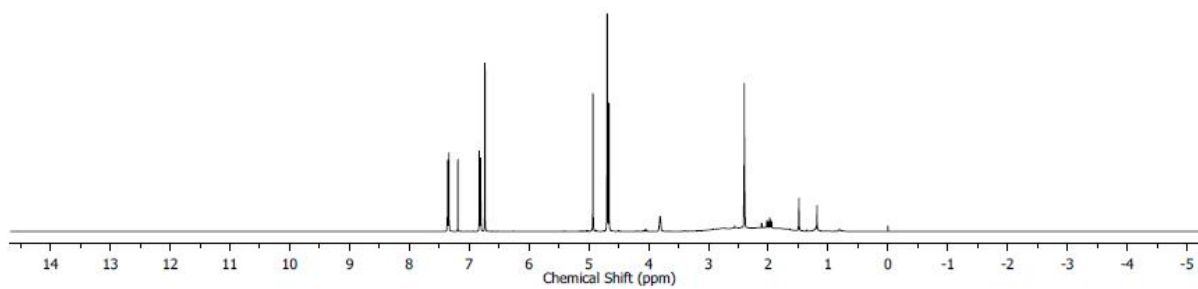

$^{13}\text{C}$   $\{^1\text{H}\}$  NMR of Compound 7:

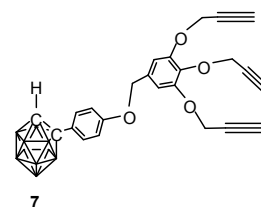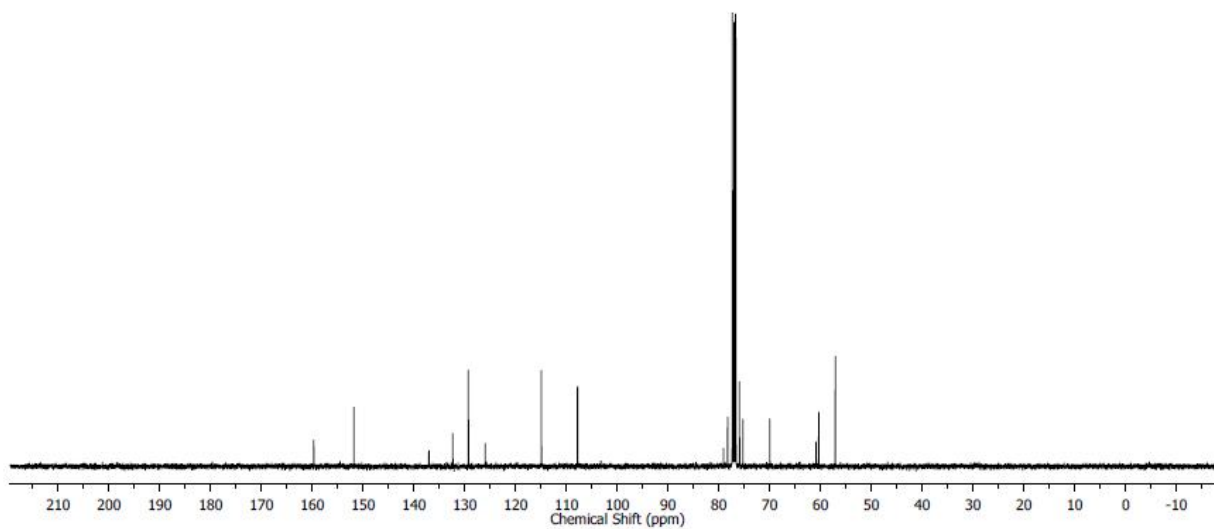

$^{11}\text{B} \{^1\text{H}\}$  NMR of Compound 7:

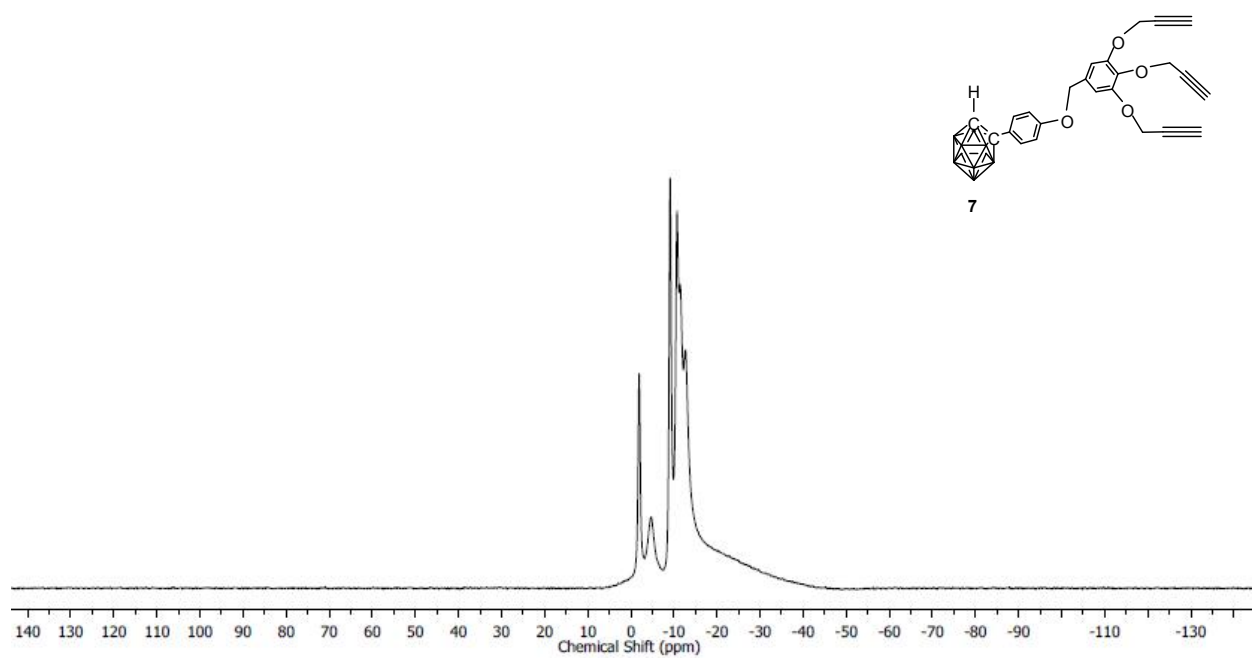

$^1\text{H}$  NMR of Compound 9:

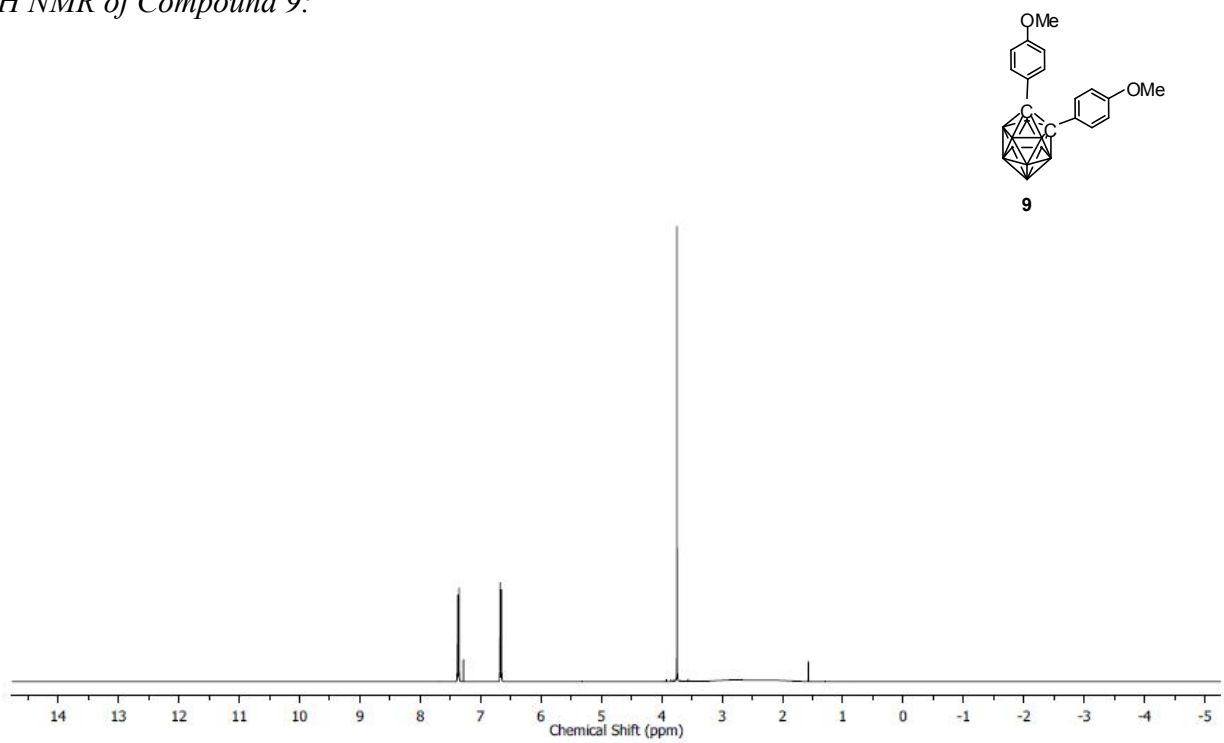

$^{13}\text{C} \{^1\text{H}\}$  NMR of Compound 9:

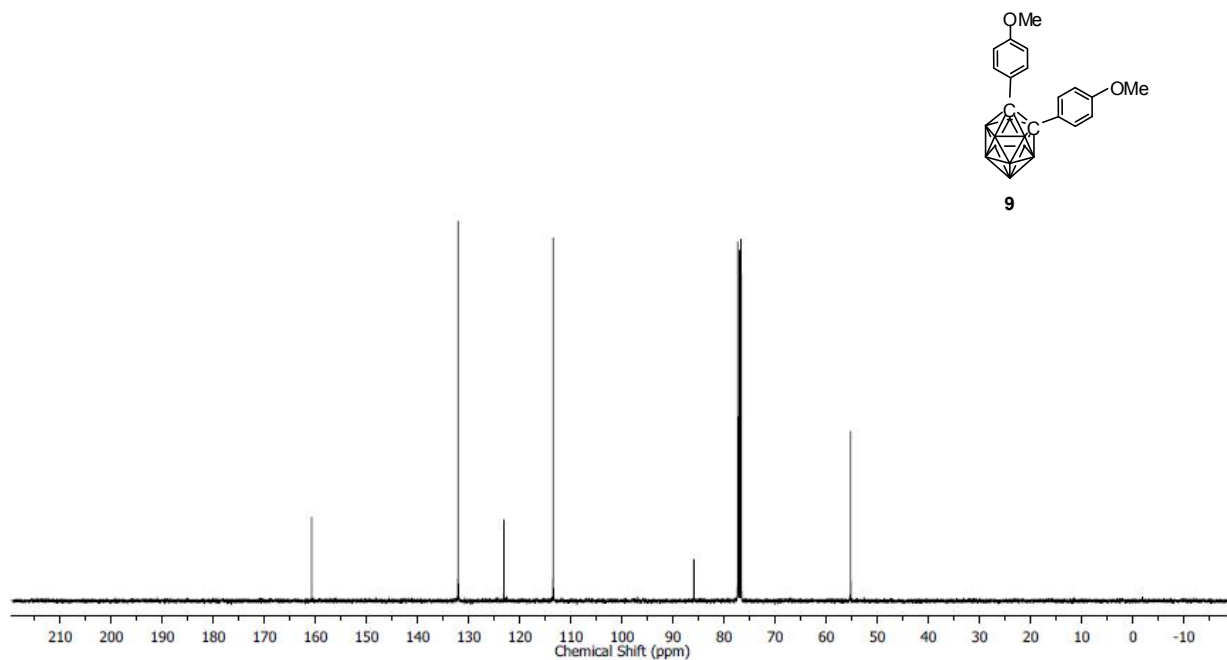

$^{11}\text{B} \{^1\text{H}\}$  NMR of Compound 9:

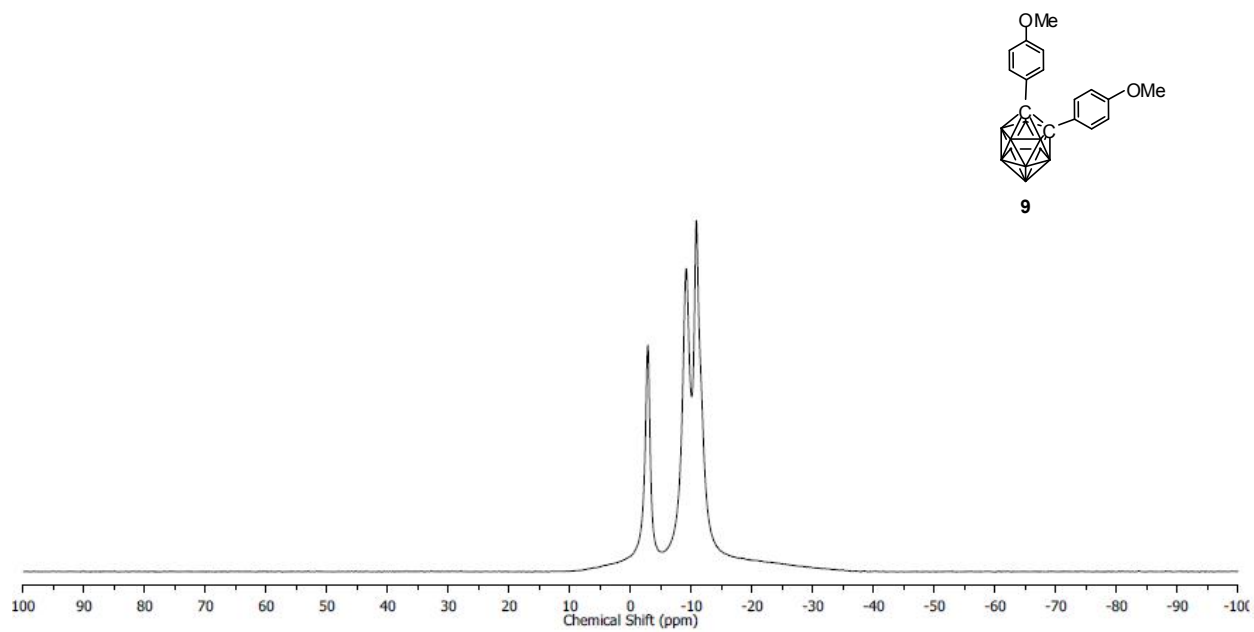

$^1\text{H}$  NMR of Compound 10:

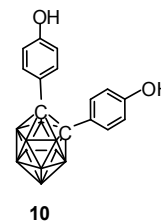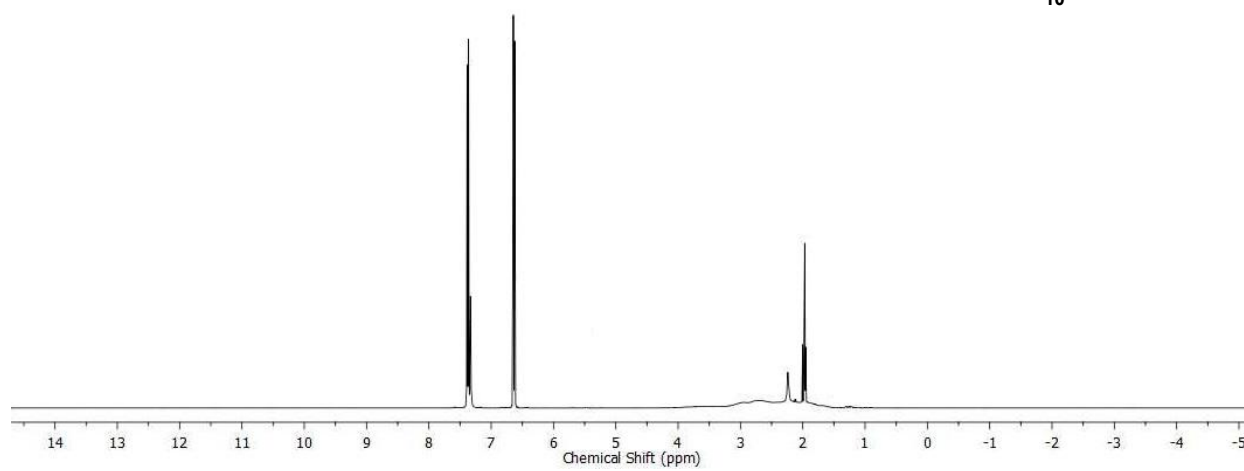

$^{13}\text{C}$  { $^1\text{H}$ } NMR of Compound 10:

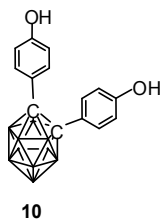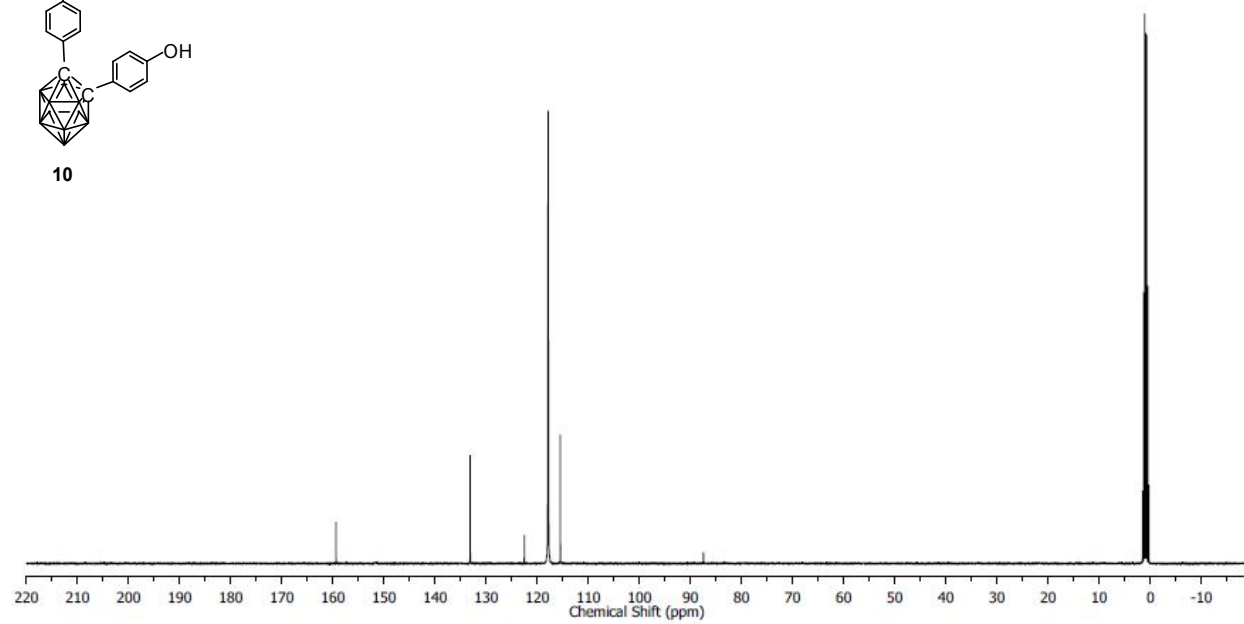



$^{11}\text{B} \{^1\text{H}\}$  NMR of Compound 10:

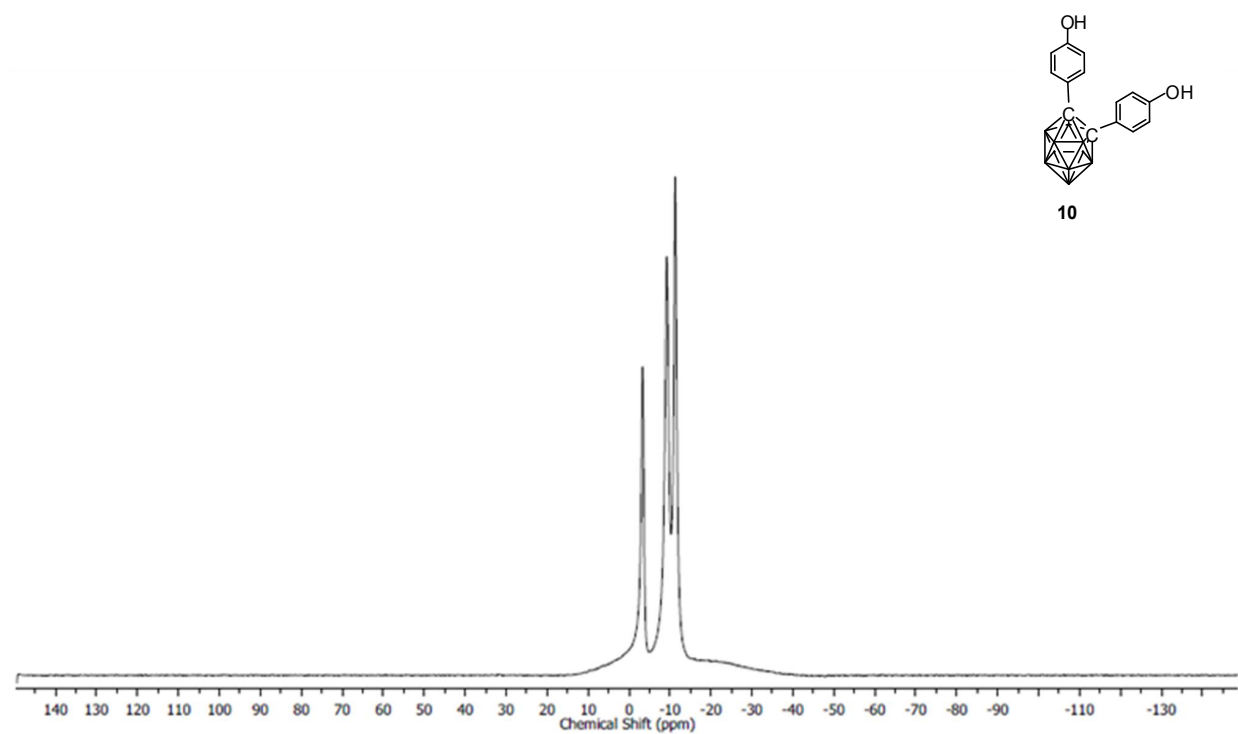

$^1\text{H}$  NMR of Compound 11:

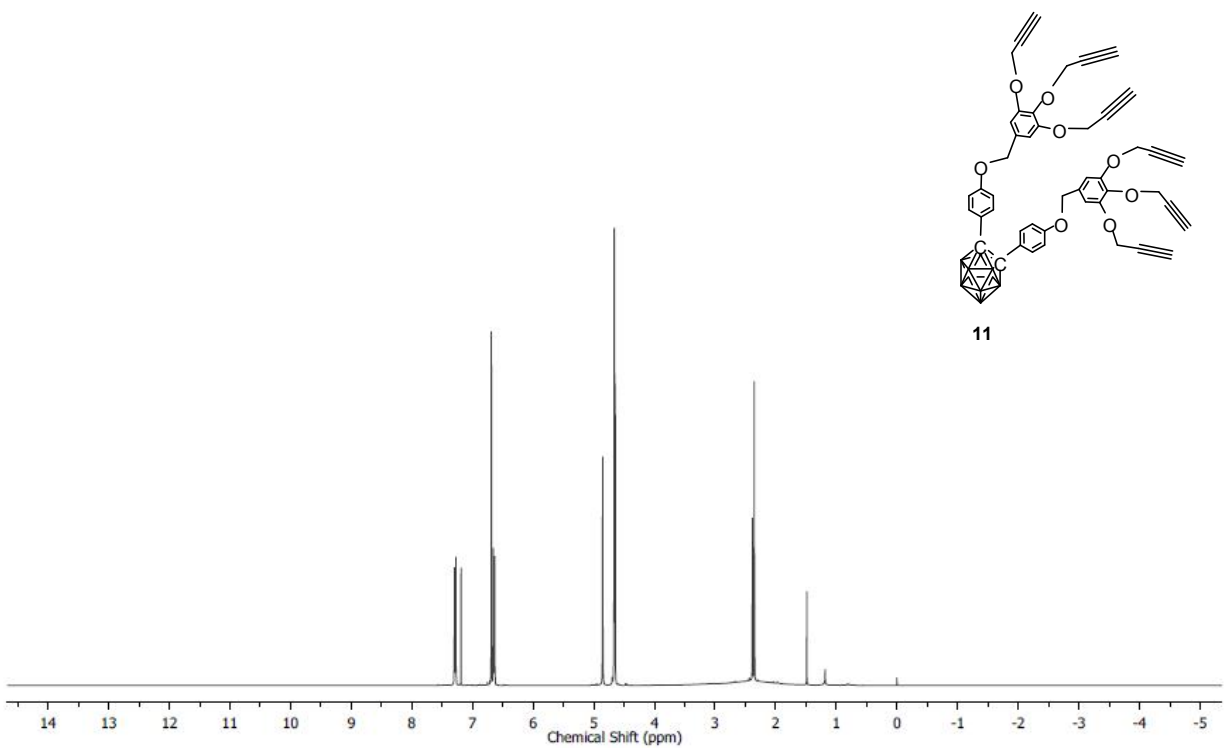

$^{13}\text{C} \{^1\text{H}\}$  NMR of Compound 11:

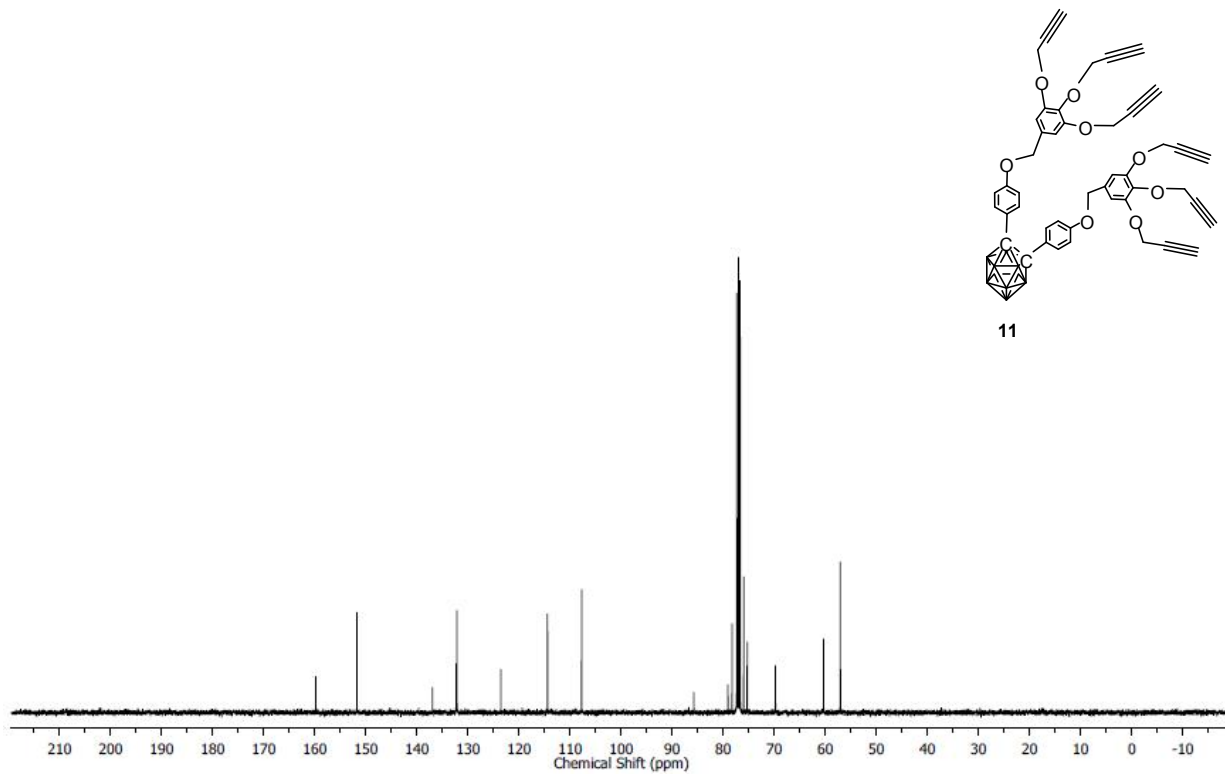

$^{11}\text{B} \{^1\text{H}\}$  NMR of Compound 11:

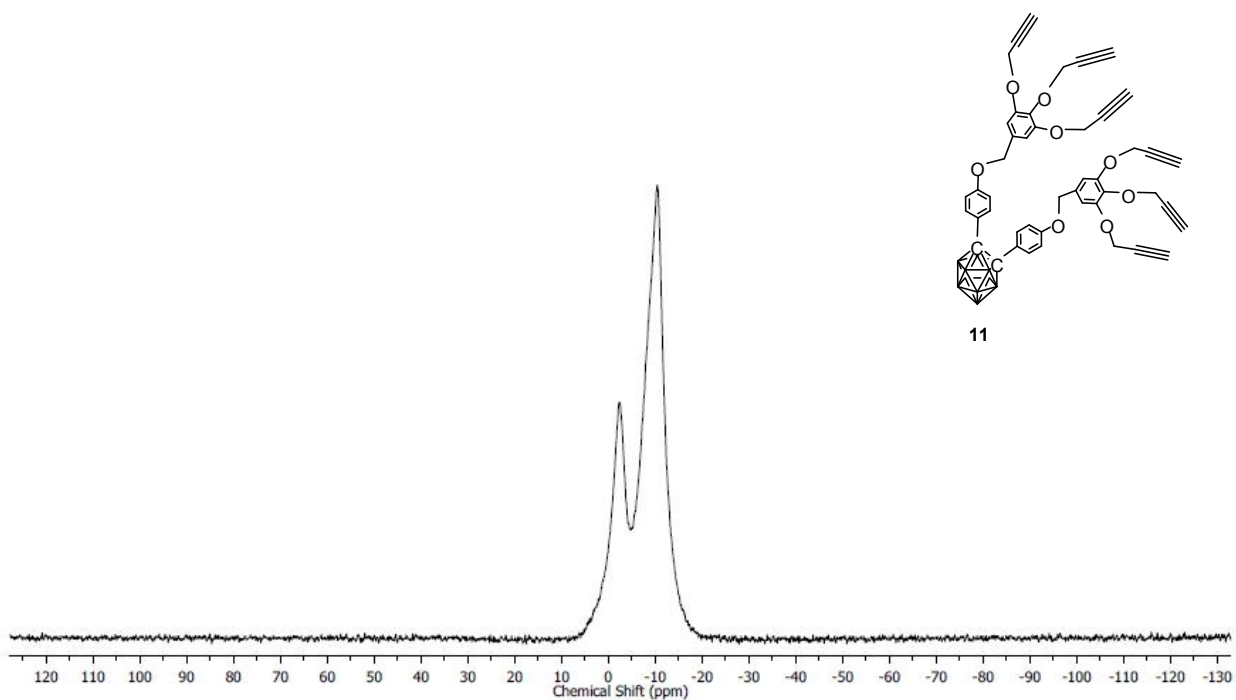

$^1\text{H}$  NMR of Compound 14:

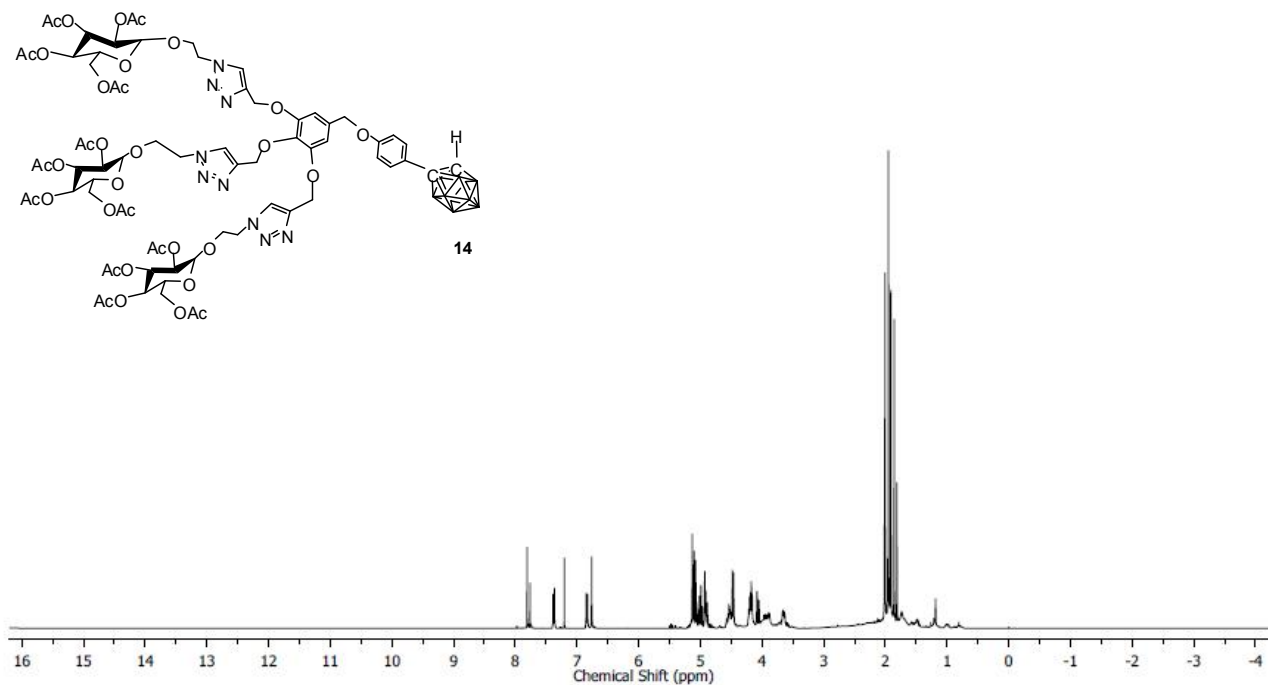

$^{13}\text{C}$   $\{^1\text{H}\}$  NMR of Compound 14:

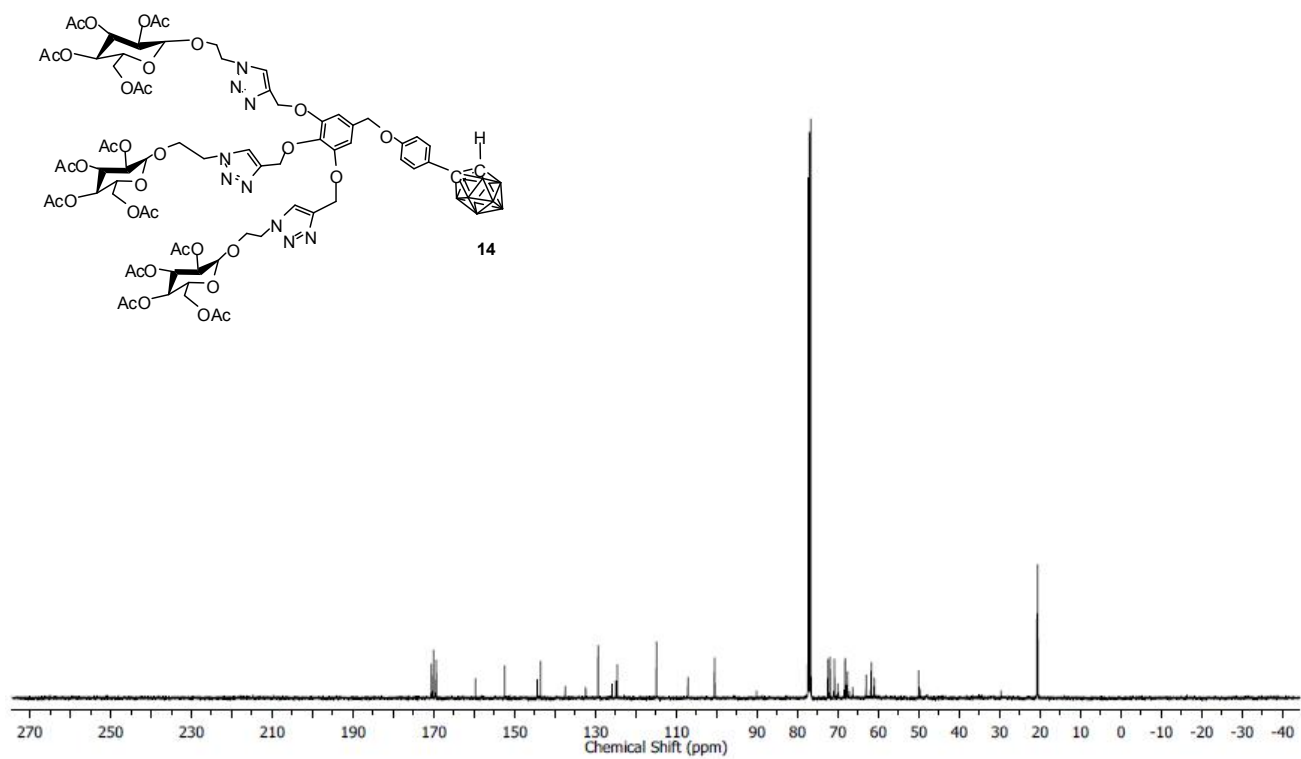

$^{11}\text{B}\{^1\text{H}\}$  NMR of Compound 14:

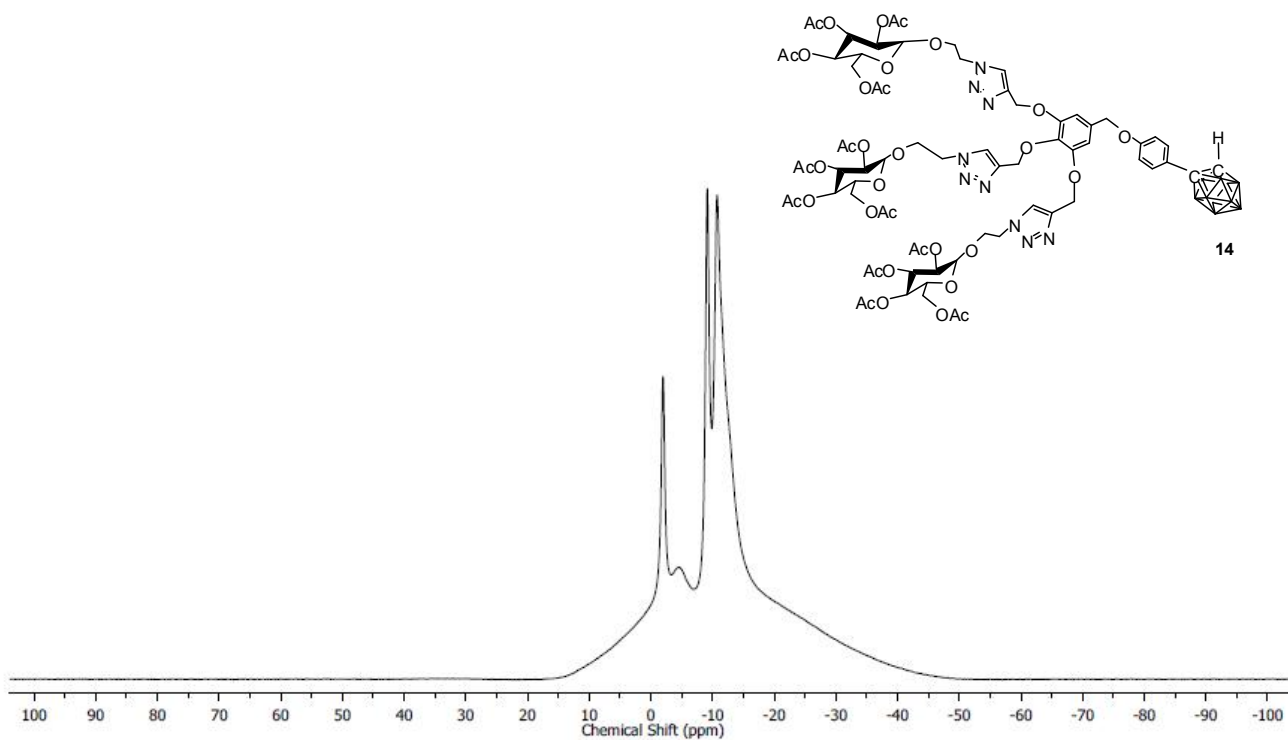

$^1\text{H}$  NMR of Compound 15:

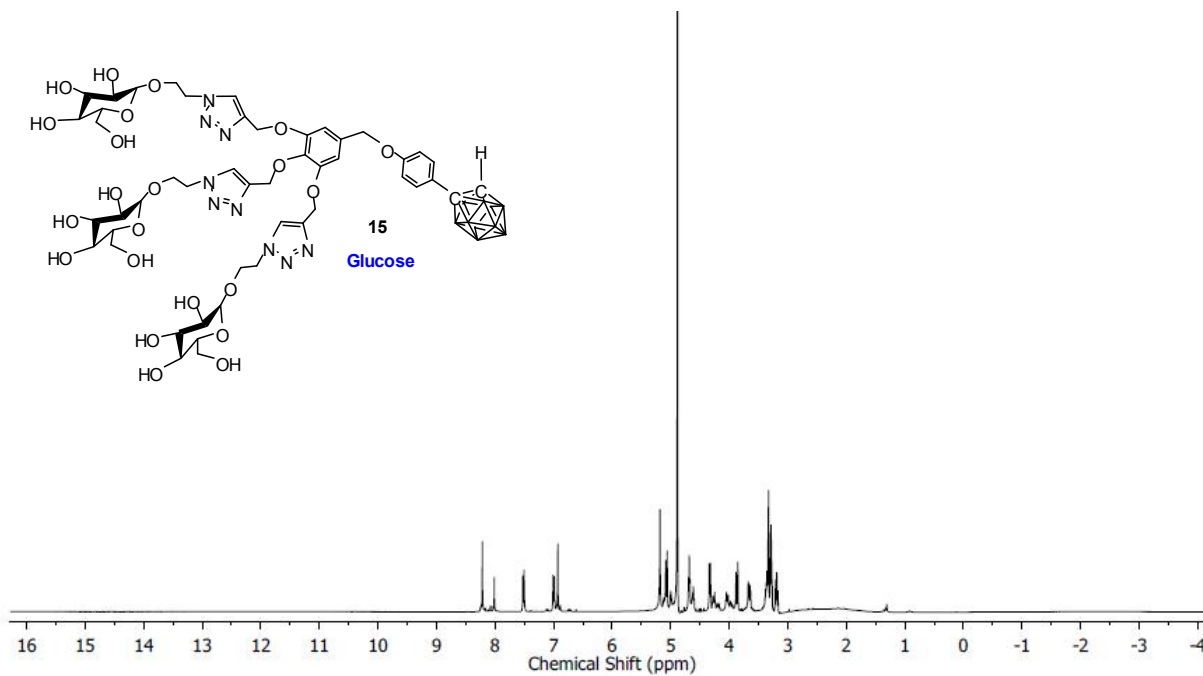

$^{13}\text{C}$   $\{^1\text{H}\}$  NMR of Compound 15:

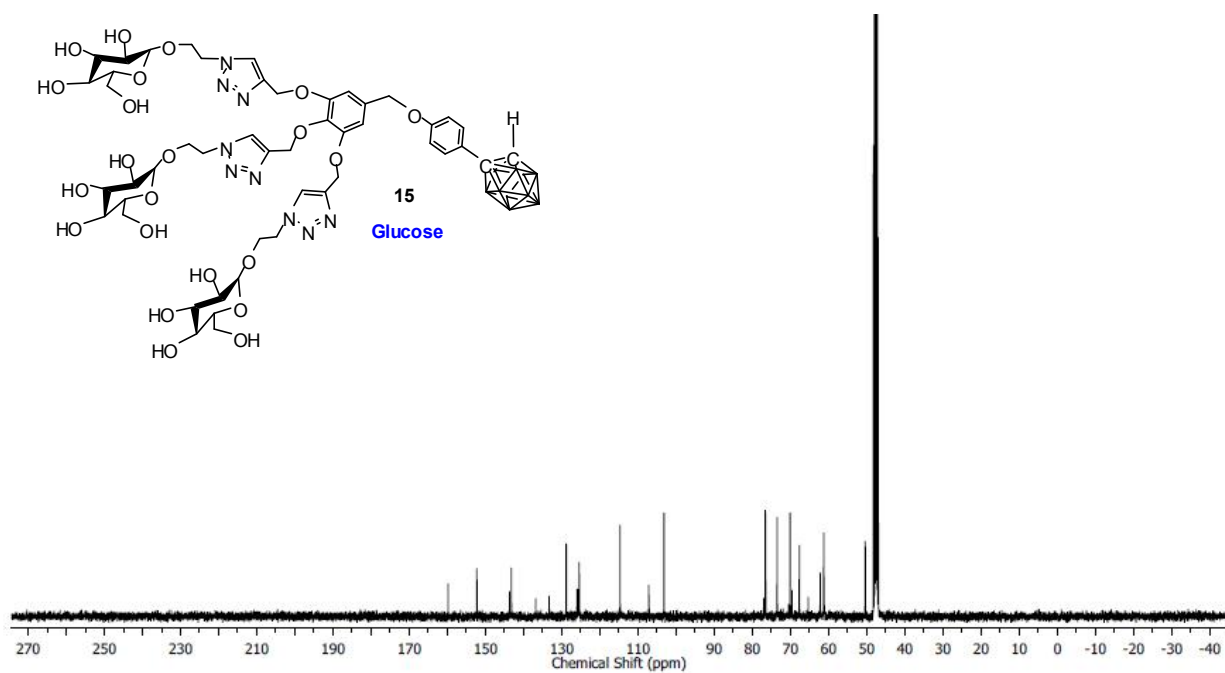

$^{11}\text{B}$   $\{^1\text{H}\}$  NMR of Compound 15:

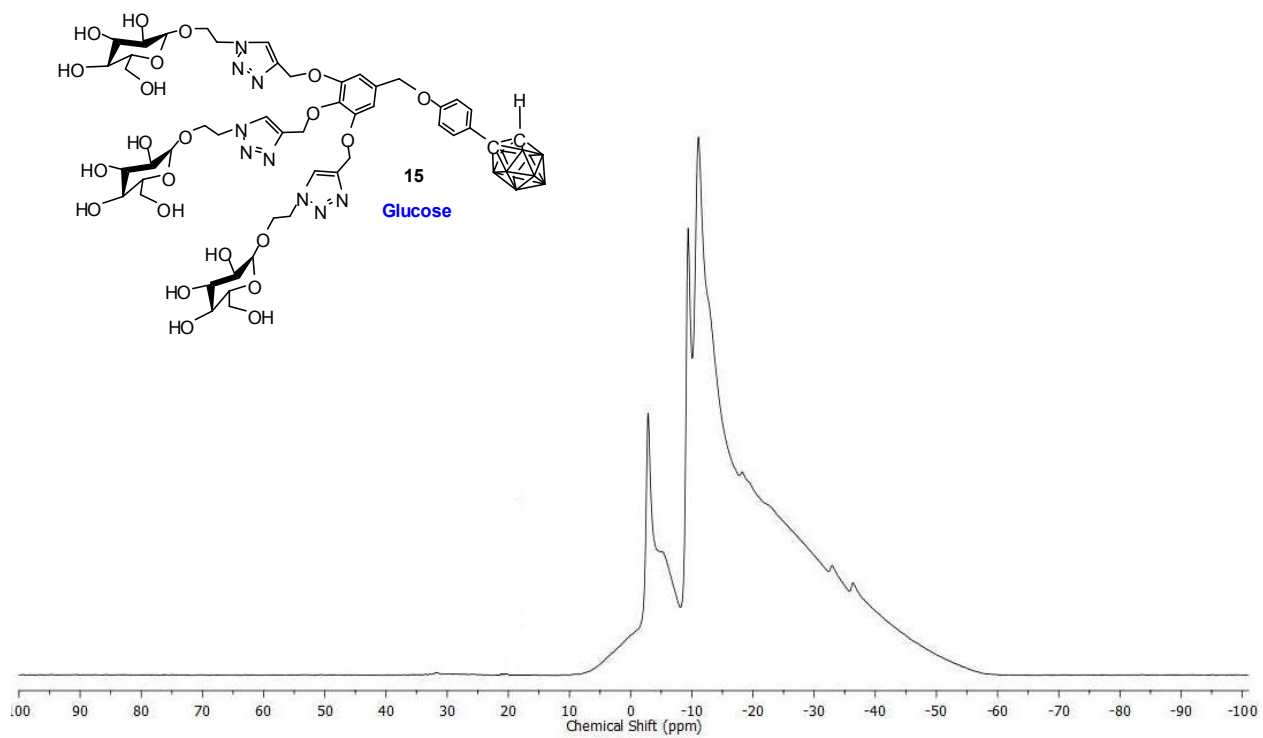

$^1\text{H}$  NMR of Compound 16:

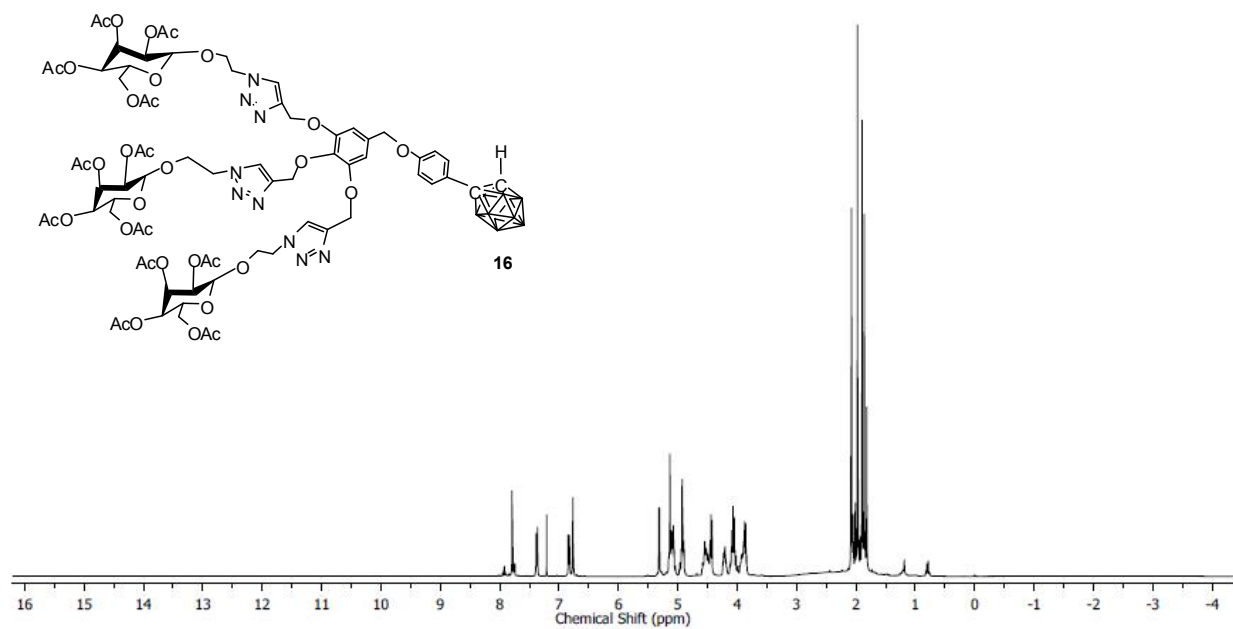

$^{13}\text{C}$   $\{^1\text{H}\}$  NMR of Compound 16:

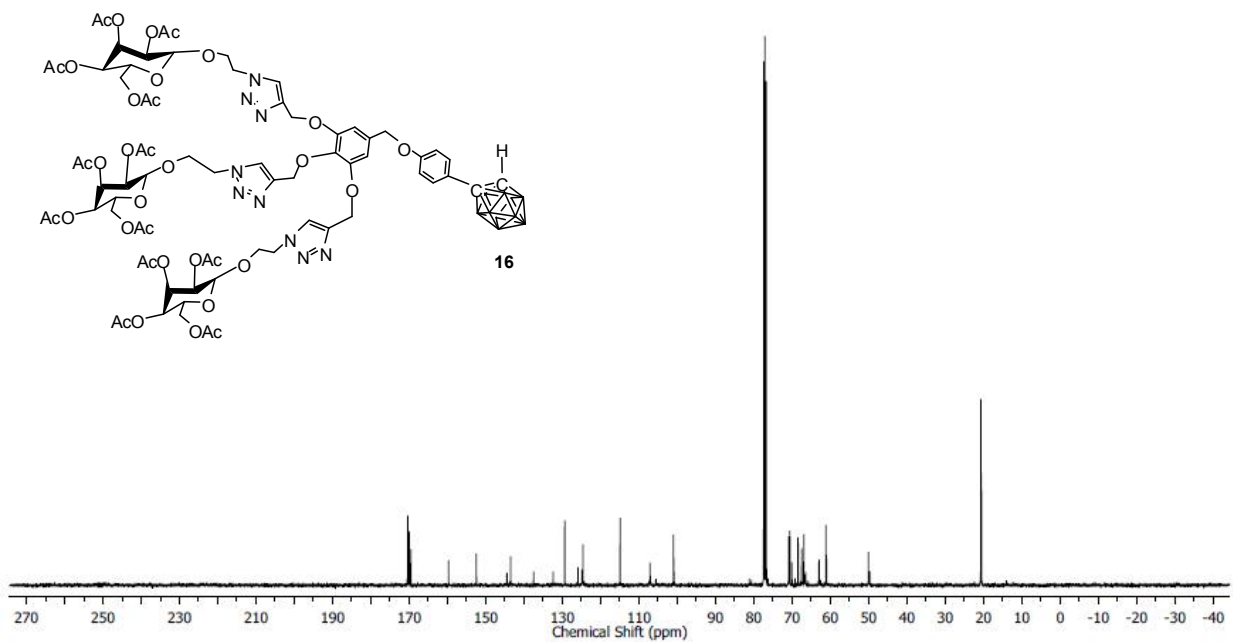

$^{11}\text{B}\{^1\text{H}\}$  NMR of Compound 16:

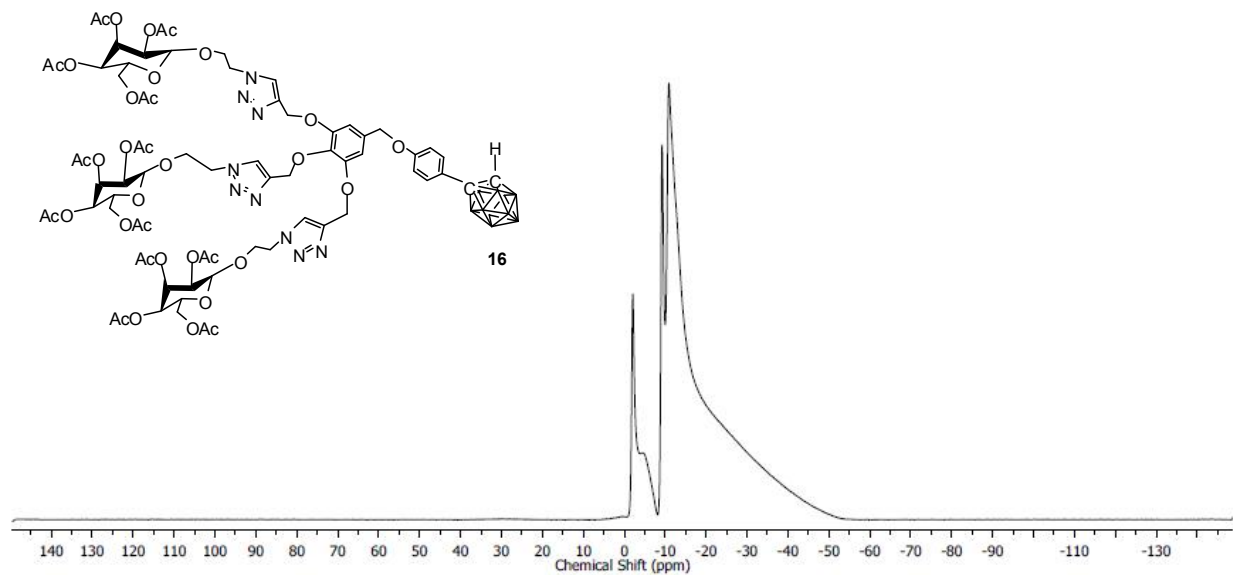

$^1\text{H}$  NMR of Compound 17:

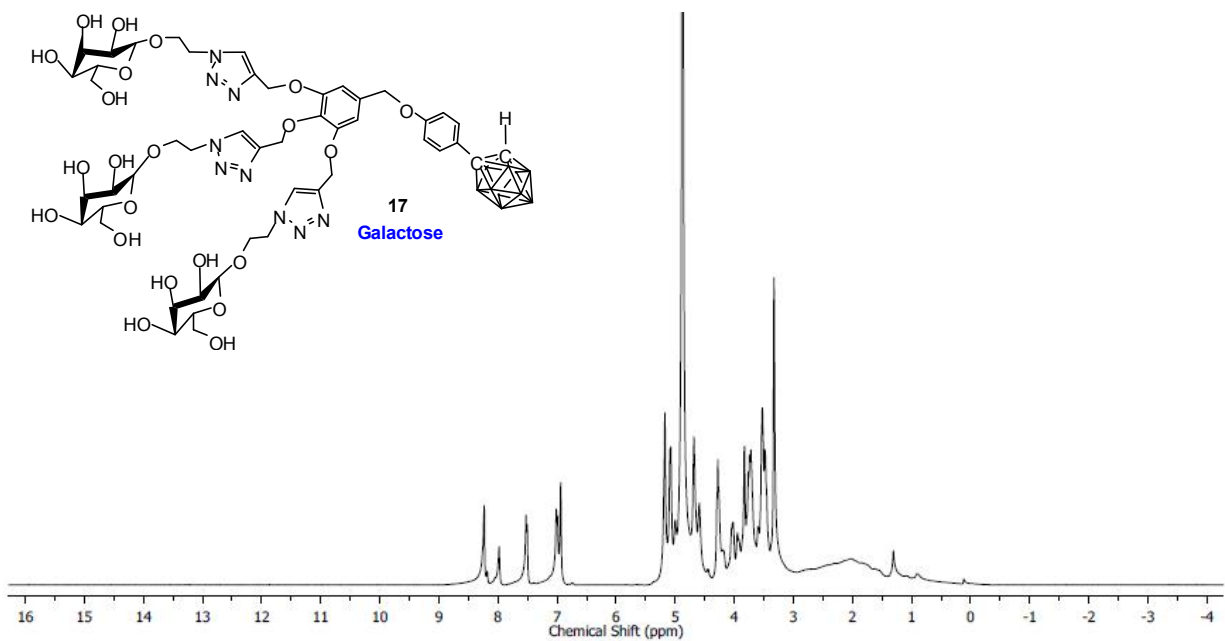

$^{13}\text{C} \{^1\text{H}\}$  NMR of Compound 17:

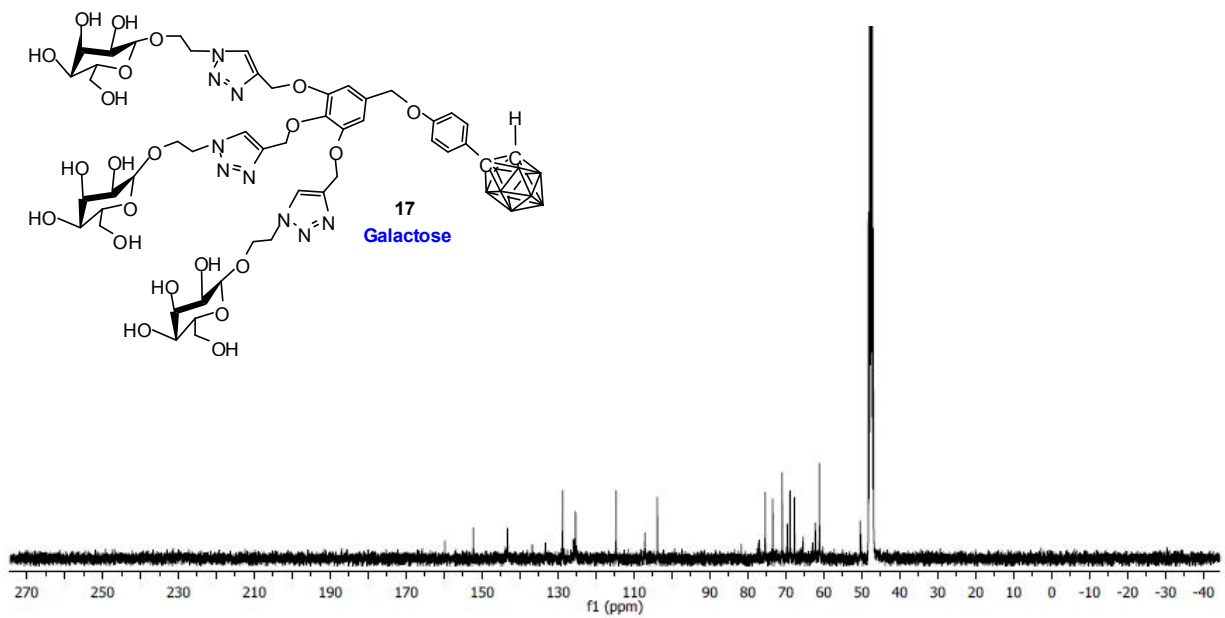

$^{11}\text{B} \{^1\text{H}\}$  NMR of Compound 17:

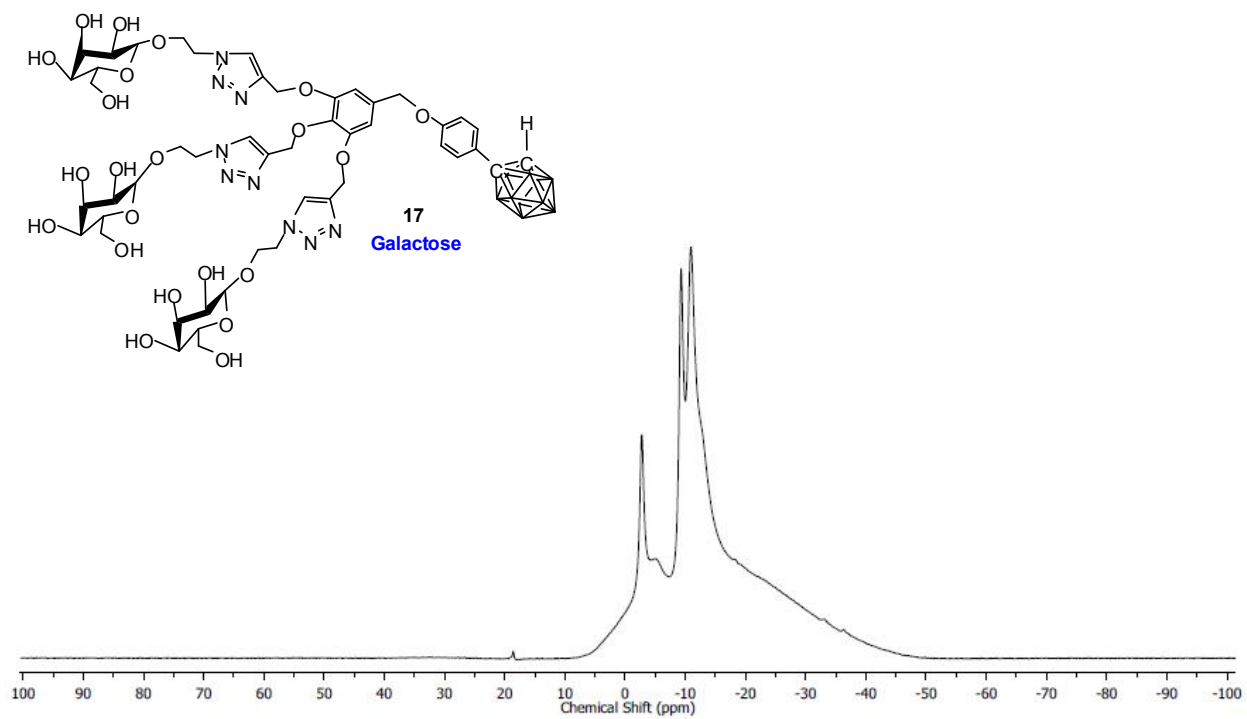



$^1\text{H}$  NMR of Compound 18:

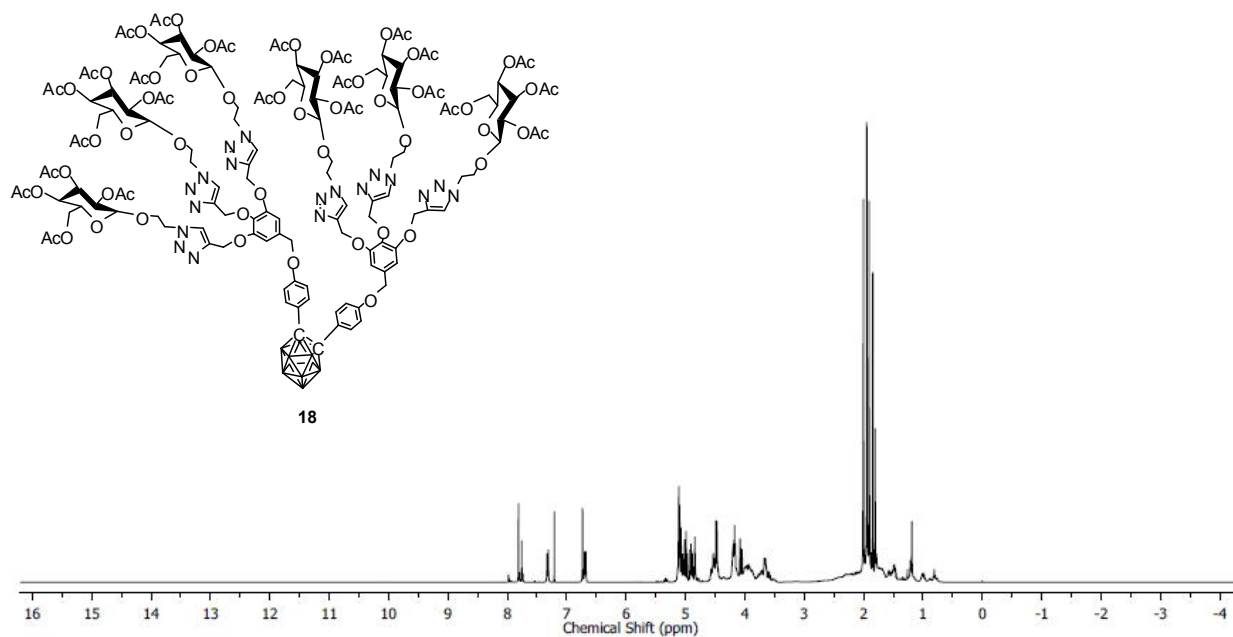

$^{13}\text{C}$   $\{^1\text{H}\}$  NMR of Compound 18:

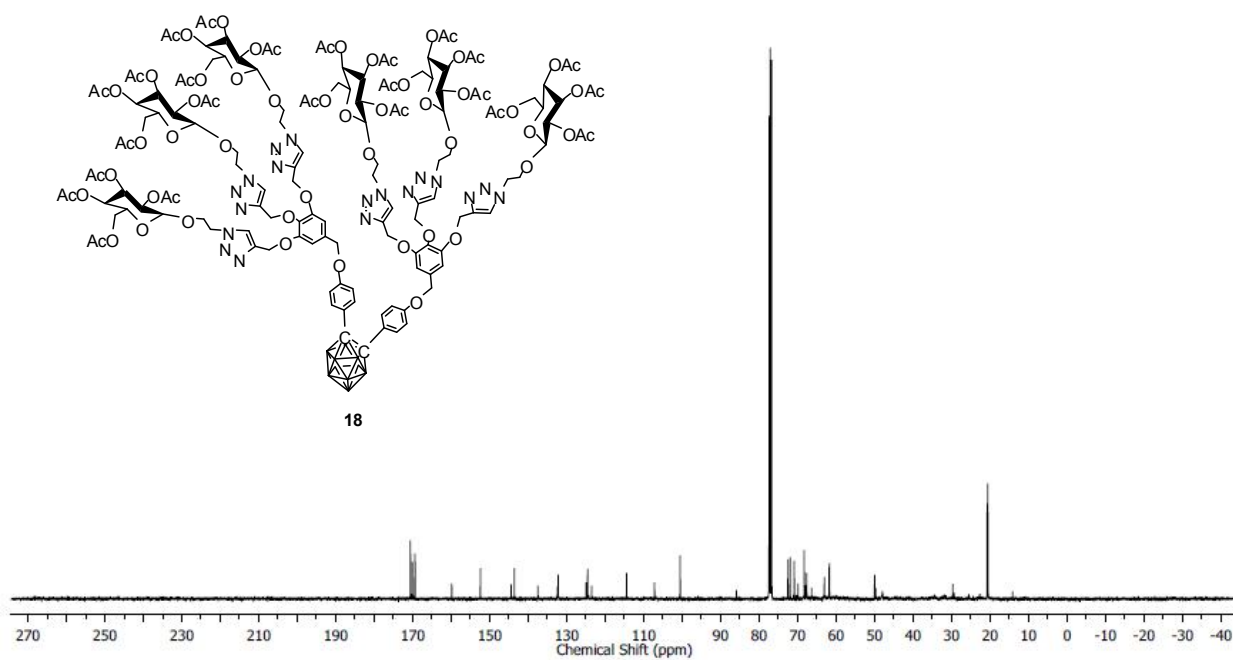

$^{11}\text{B}\{^1\text{H}\}$  NMR of Compound 18:

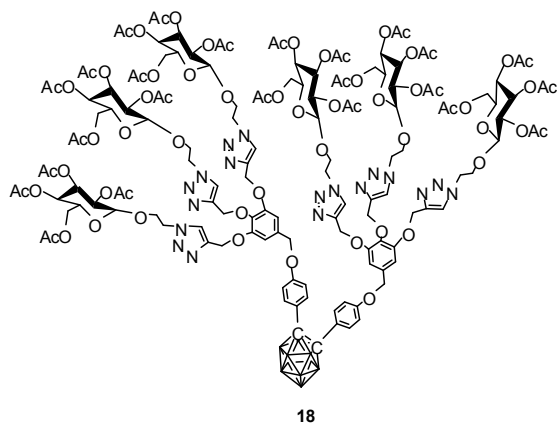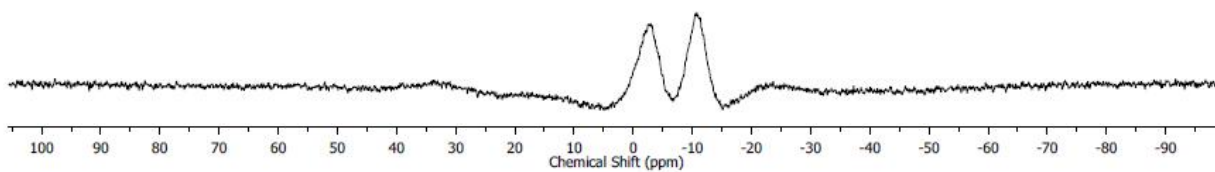

$^1\text{H}$  NMR of Compound 19:

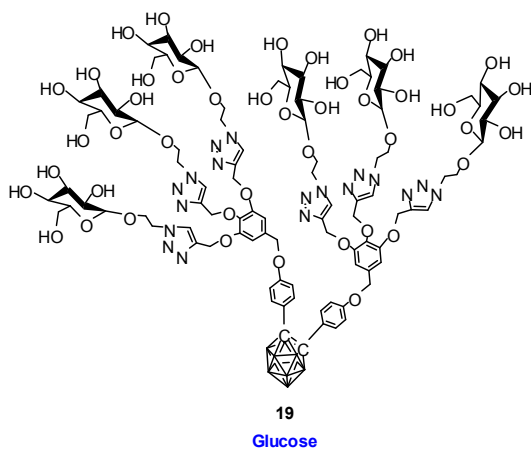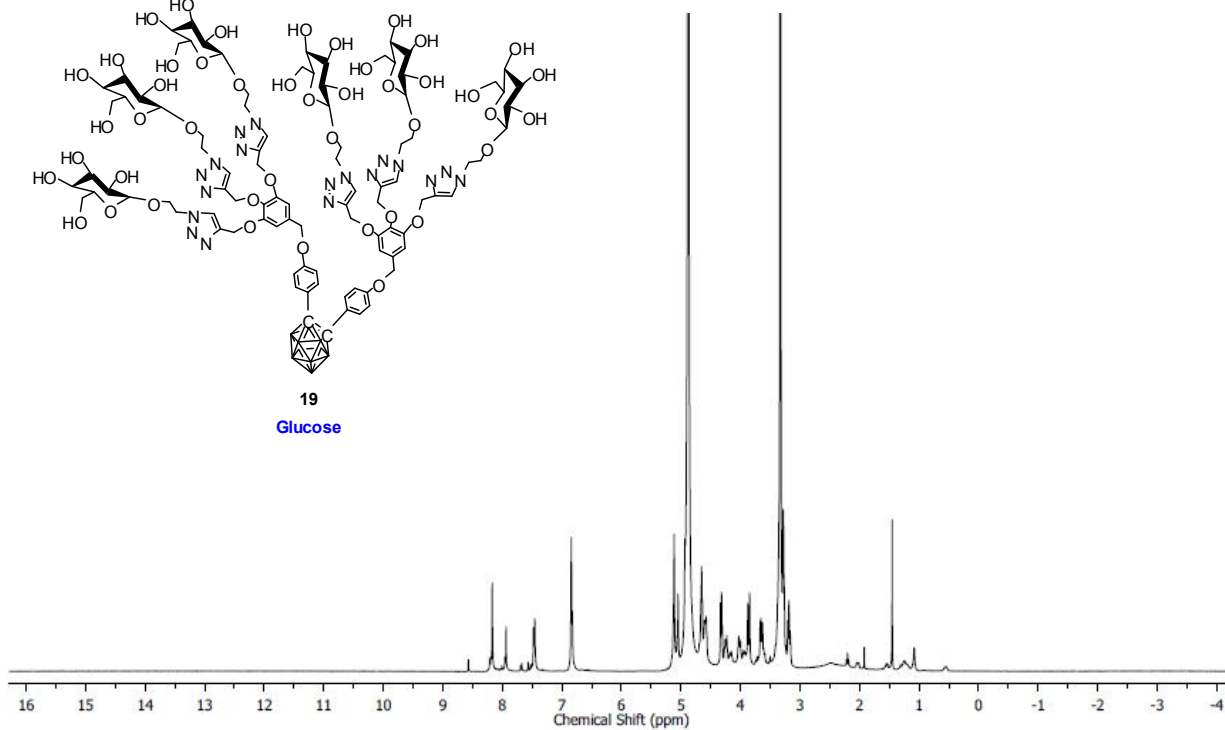

$^{13}\text{C}$   $\{^1\text{H}\}$  NMR of Compound 19:

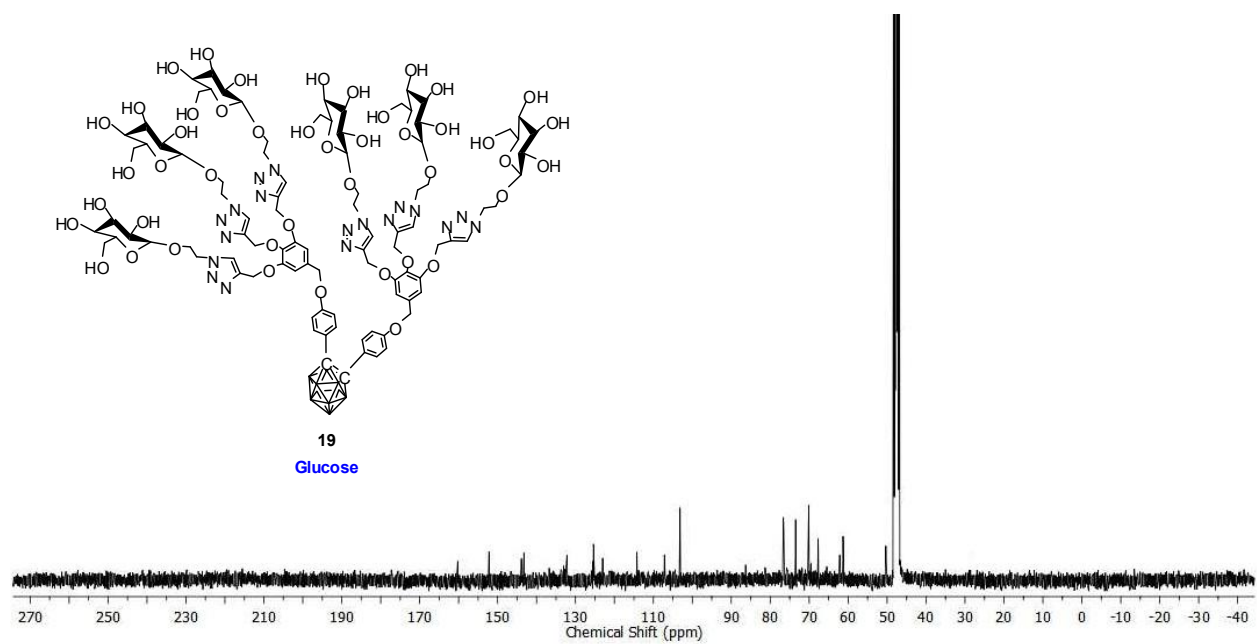

$^{11}\text{B}$   $\{^1\text{H}\}$  NMR of Compound 19:

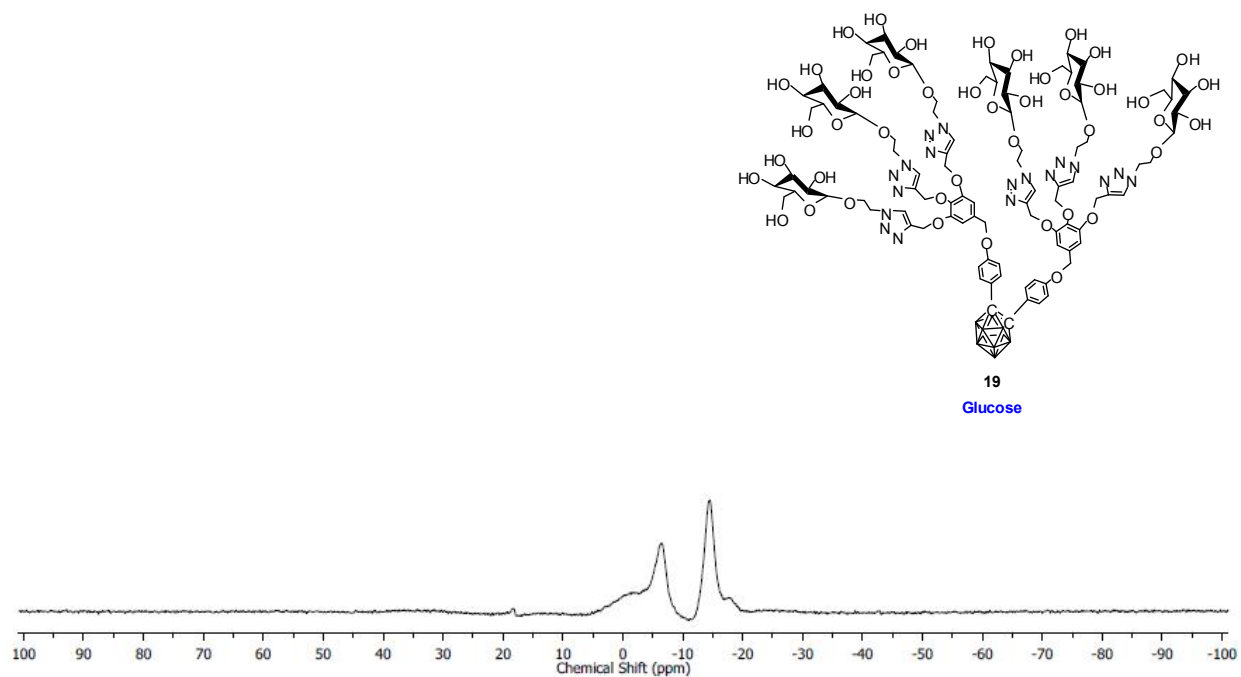

$^1\text{H}$  NMR of Compound 20:

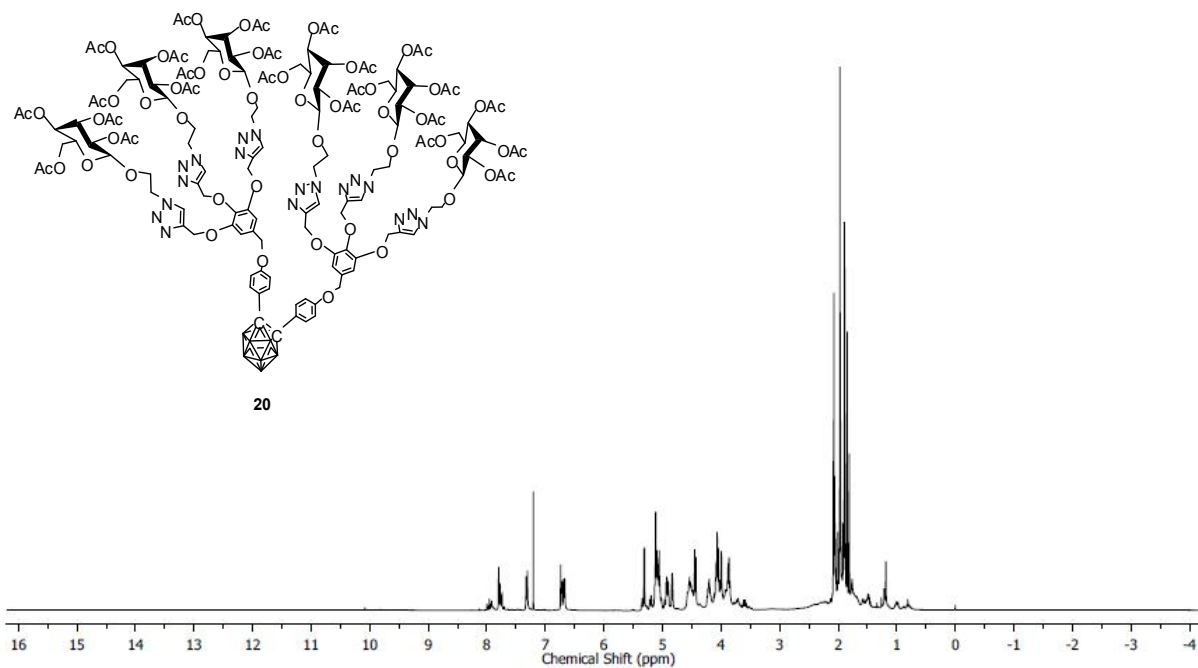

$^{13}\text{C}$   $\{^1\text{H}\}$  NMR of Compound 20:

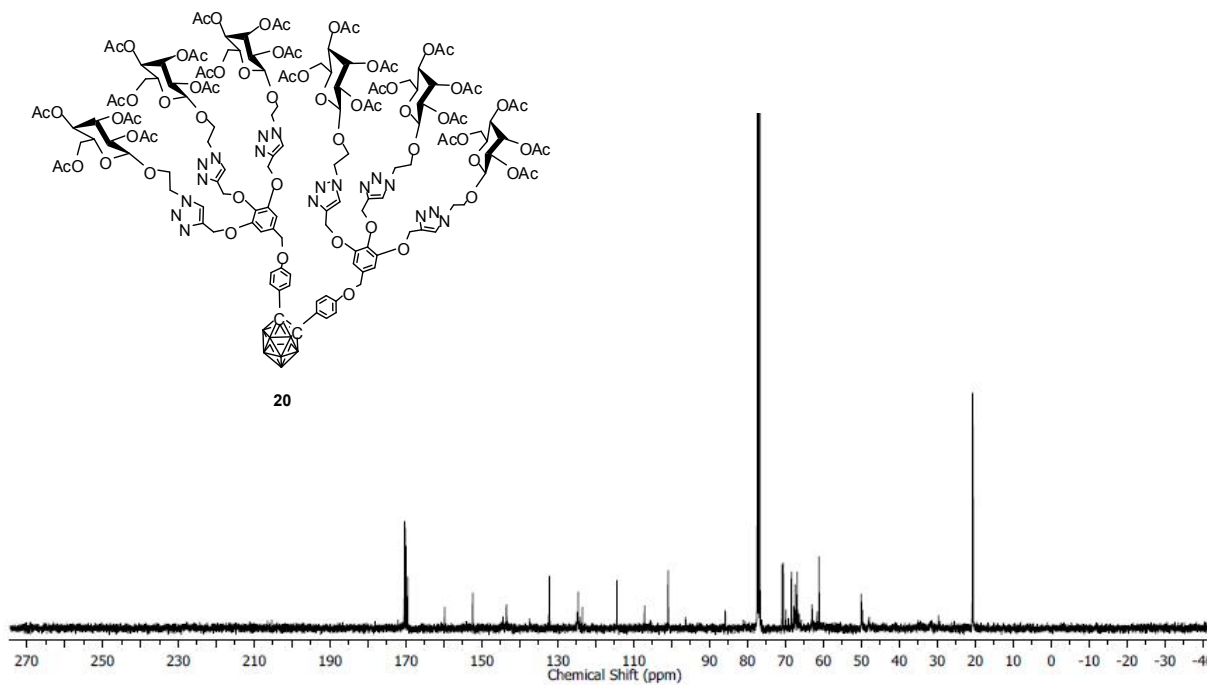

$^{11}\text{B} \{^1\text{H}\}$  NMR of Compound 20:

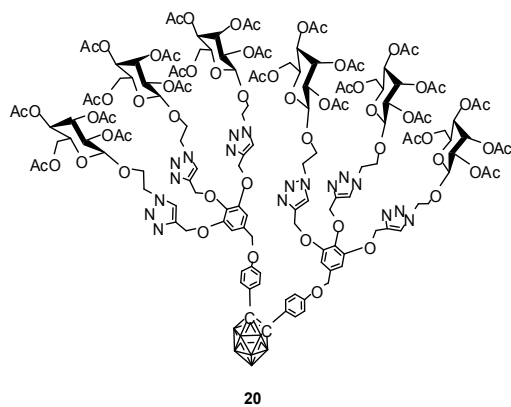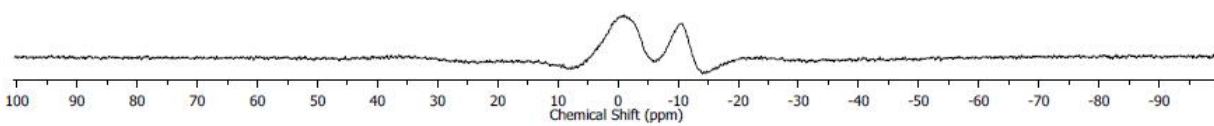

$^1\text{H}$  NMR of Compound 21:

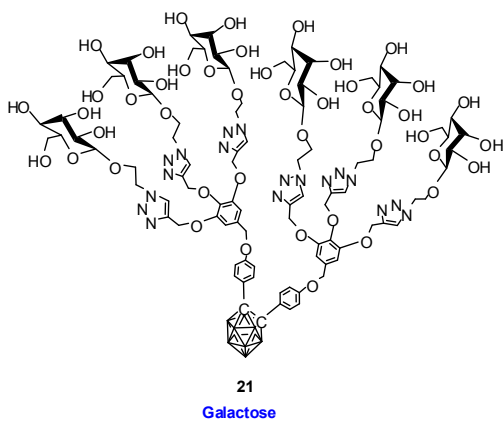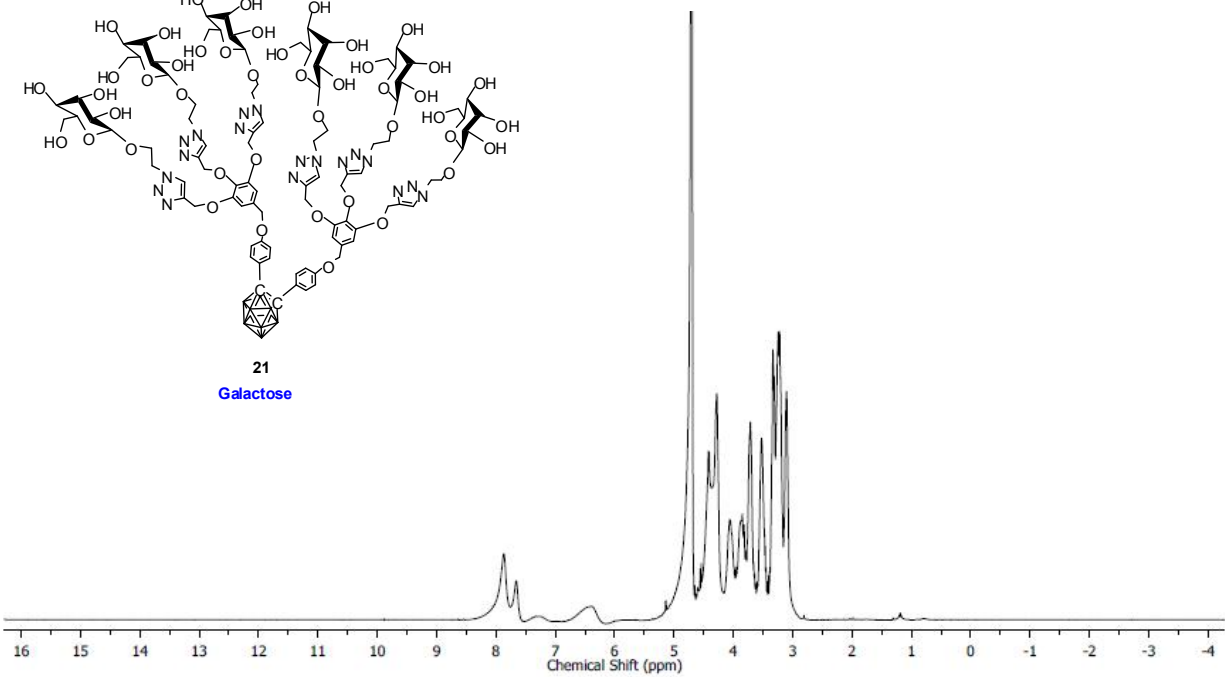

$^{13}\text{C} \{^1\text{H}\}$  NMR of Compound 21:

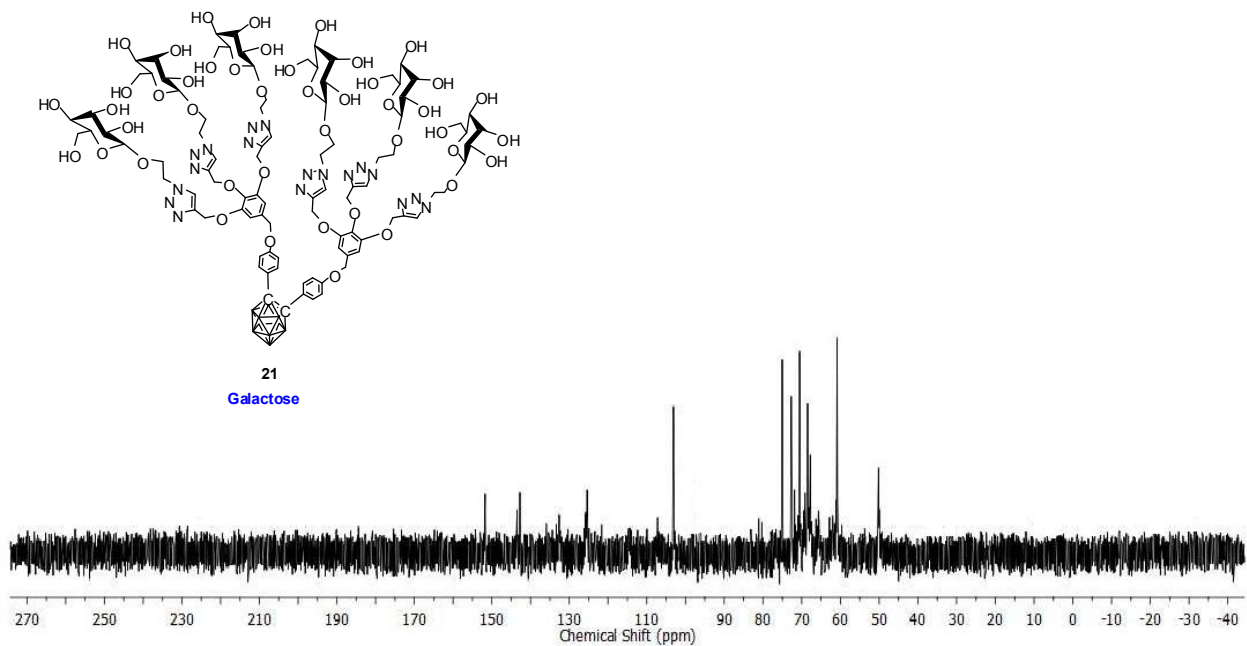

$^{11}\text{B} \{^1\text{H}\}$  NMR of Compound 21:

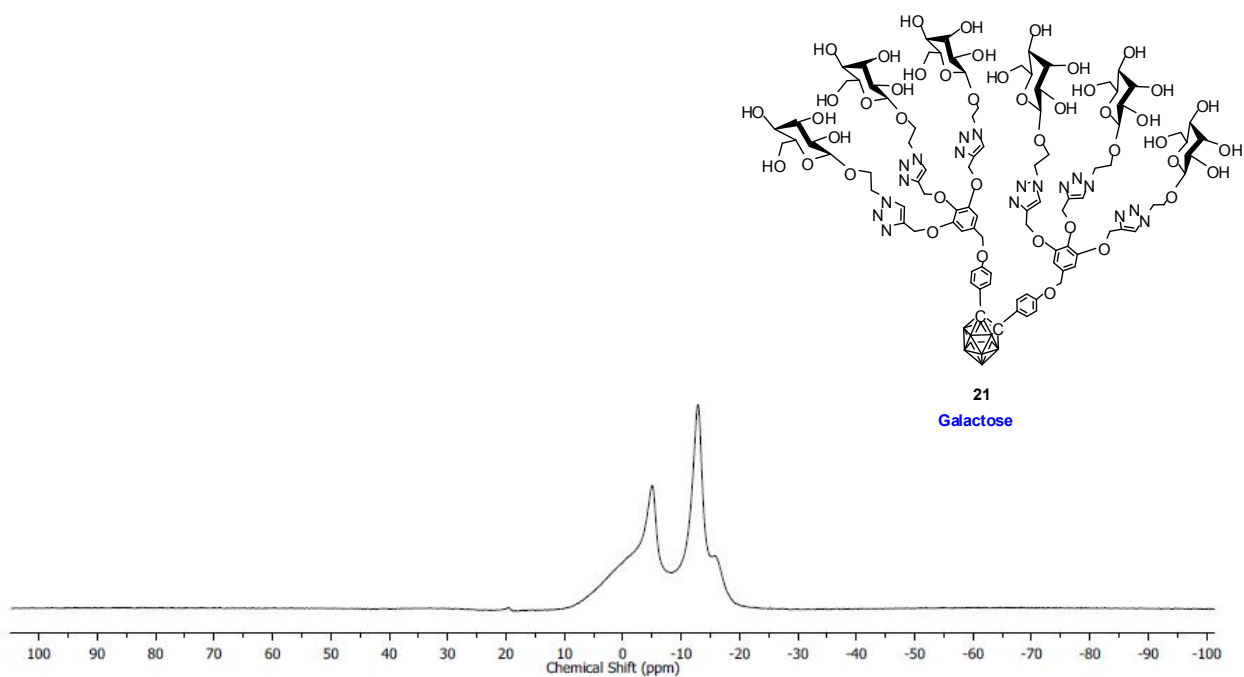

# MASS Spectra

Compound 4:

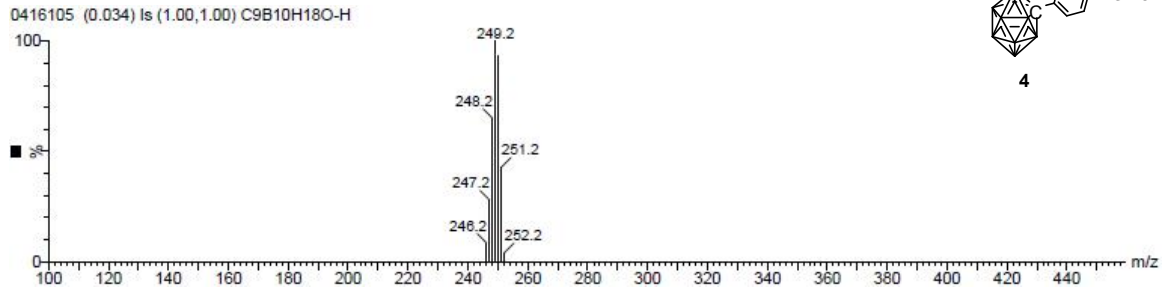

Compound 5:

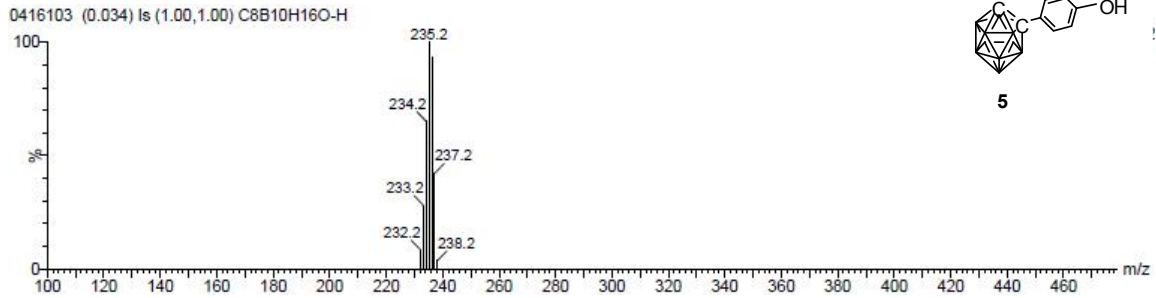

Compound 7:

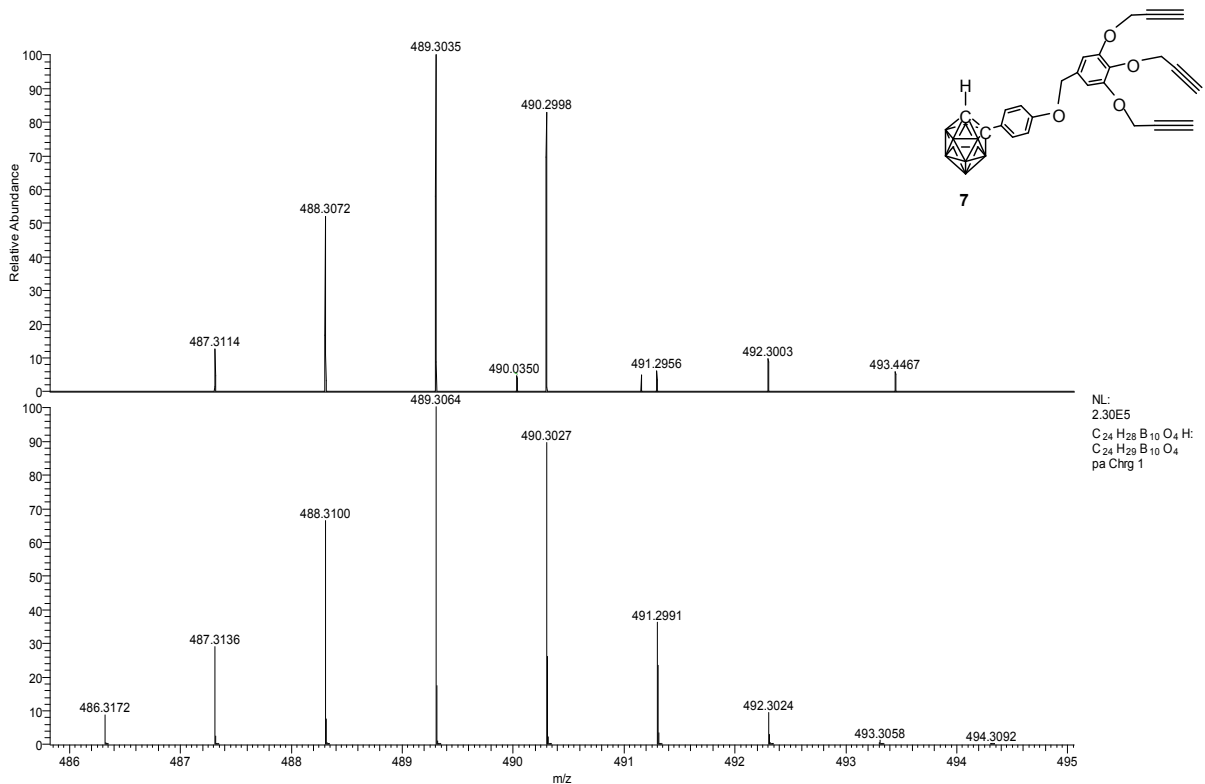

Compound 9:

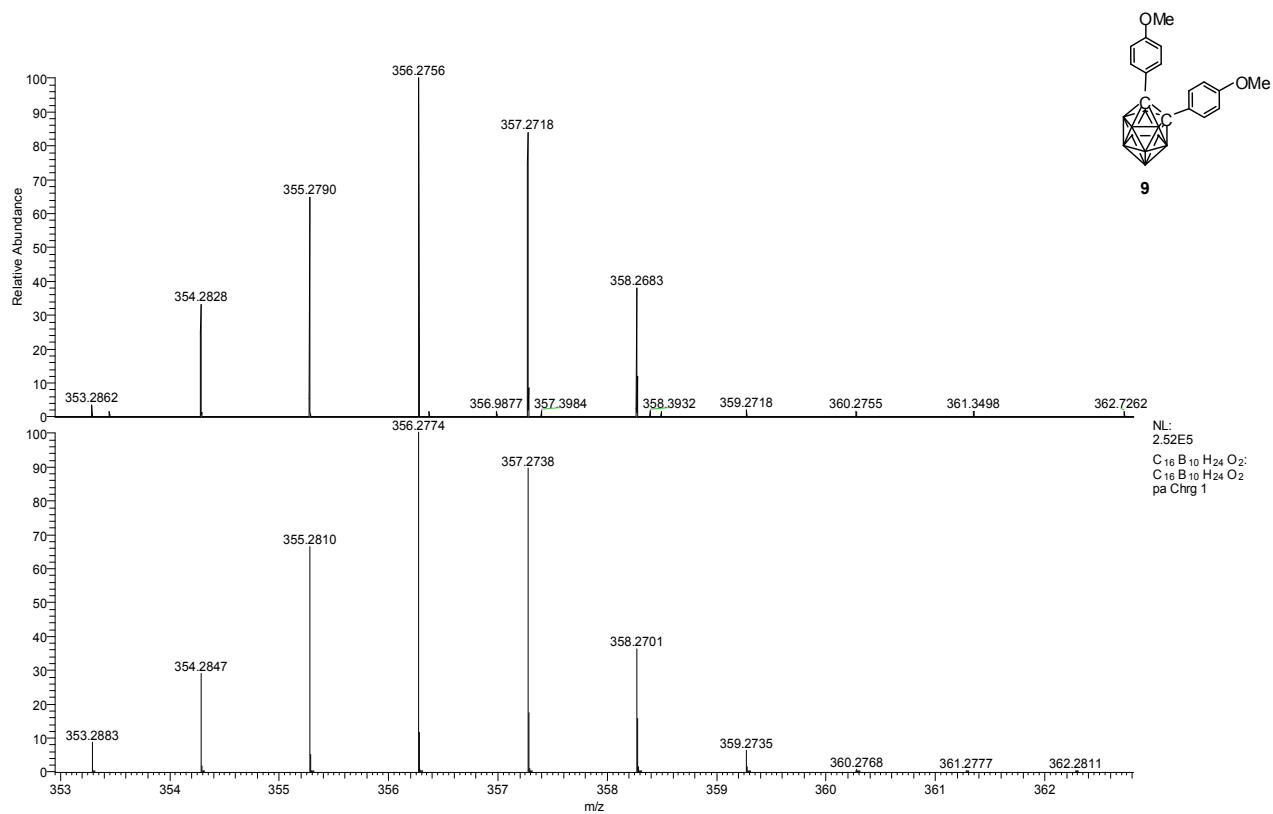

Compound 10:

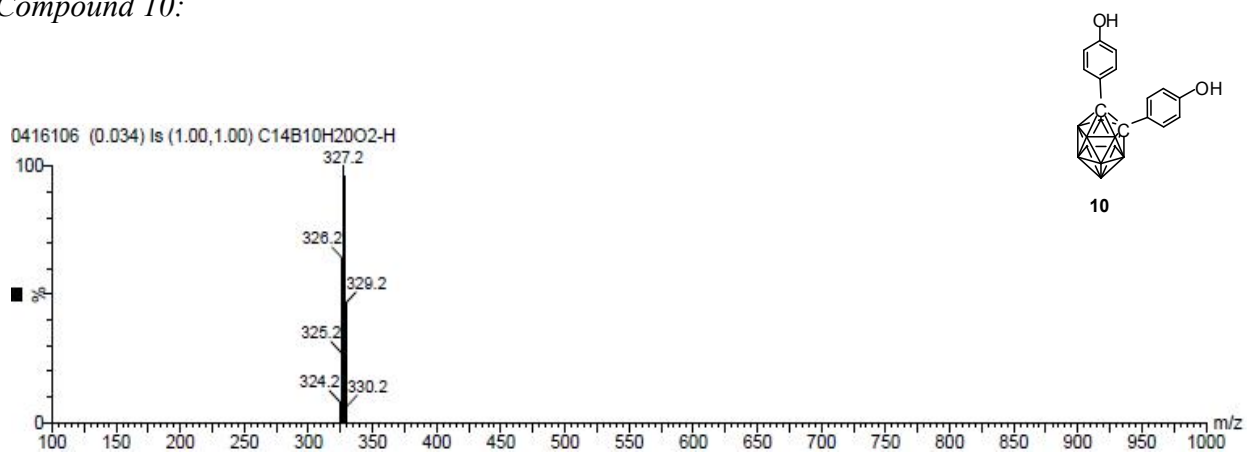



Compound 11:

0416166\_160411133623 #12-65 RT: 0.10-0.56 AV: 54 NL: 9.74E4  
T: FTMS + p APCI corona Full ms [100.00-1000.00]

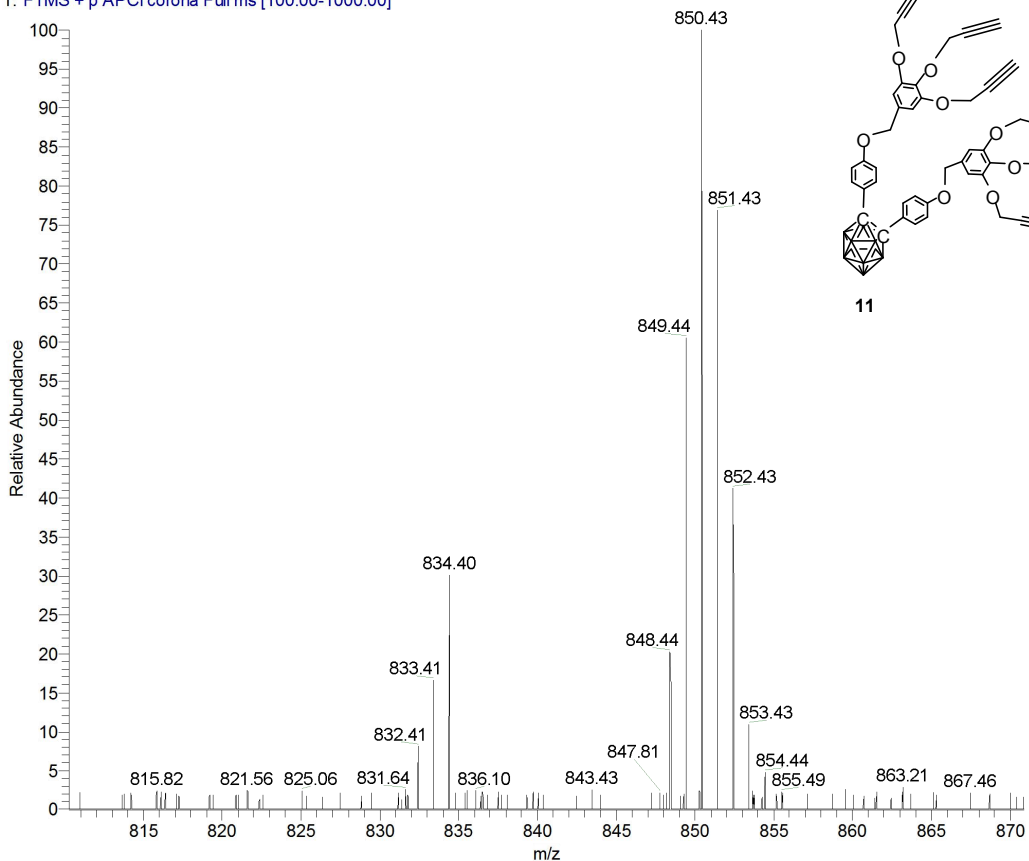

Compound 14:

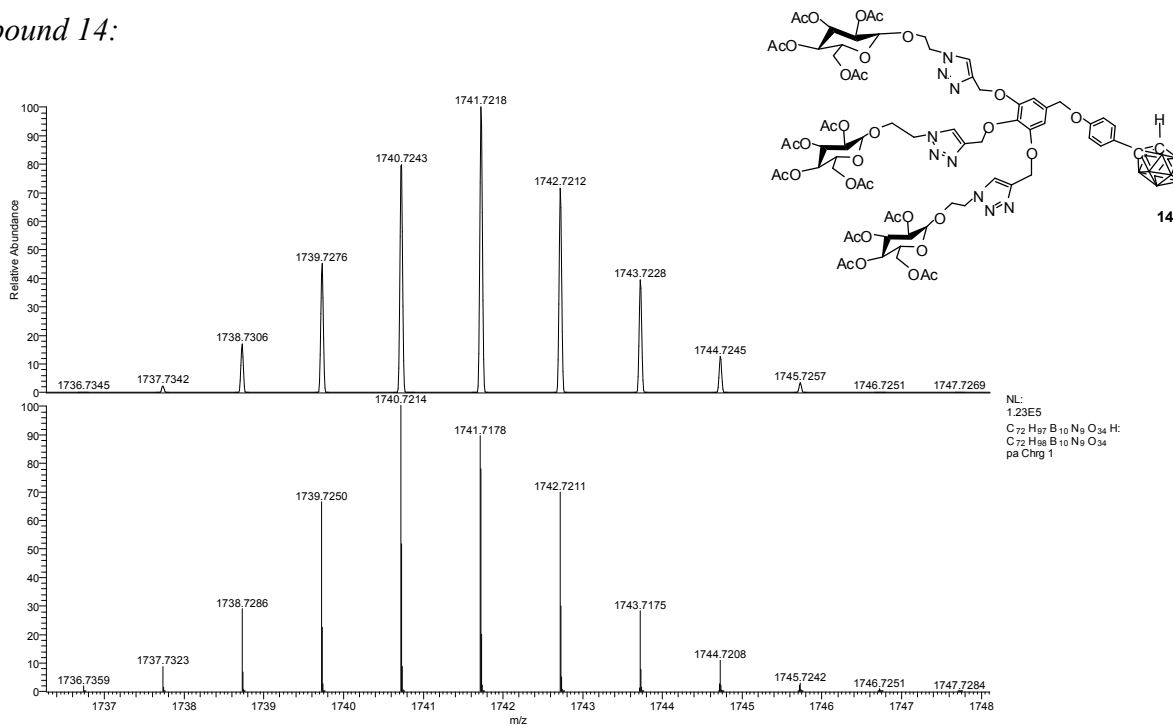

Compound 15:

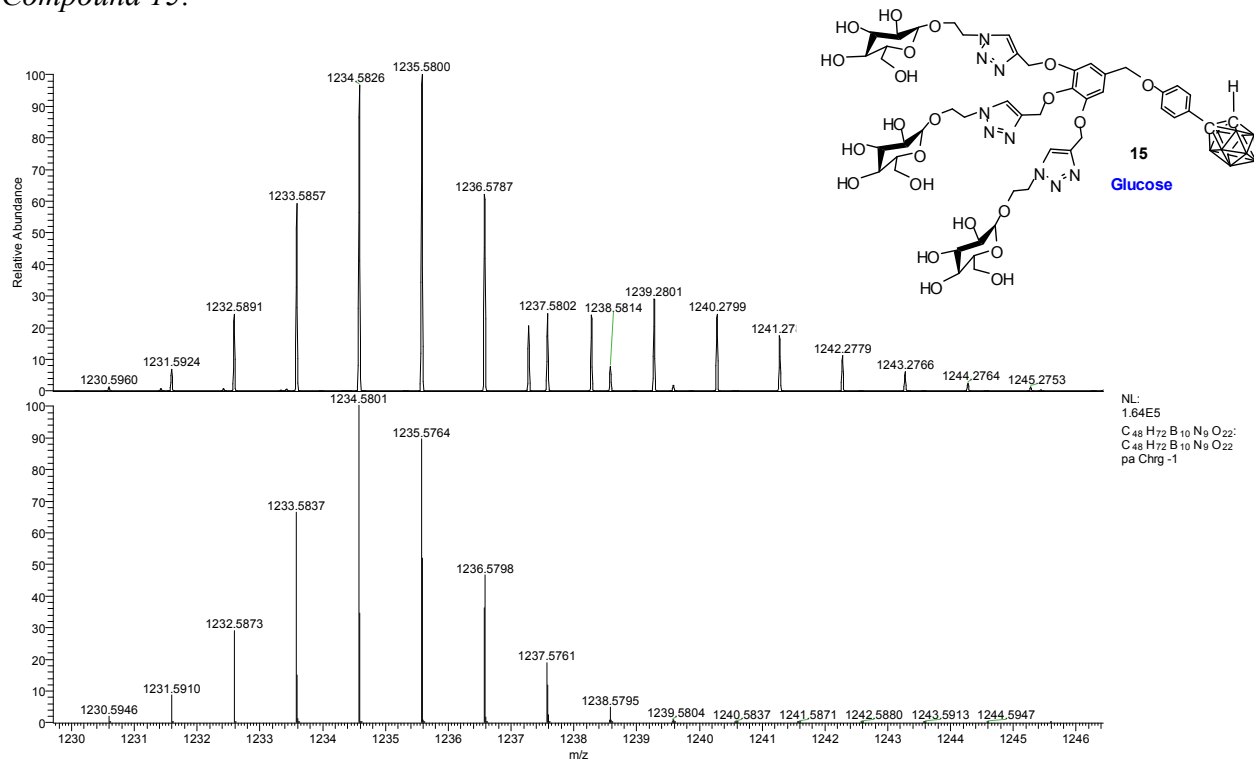

Compound 16:

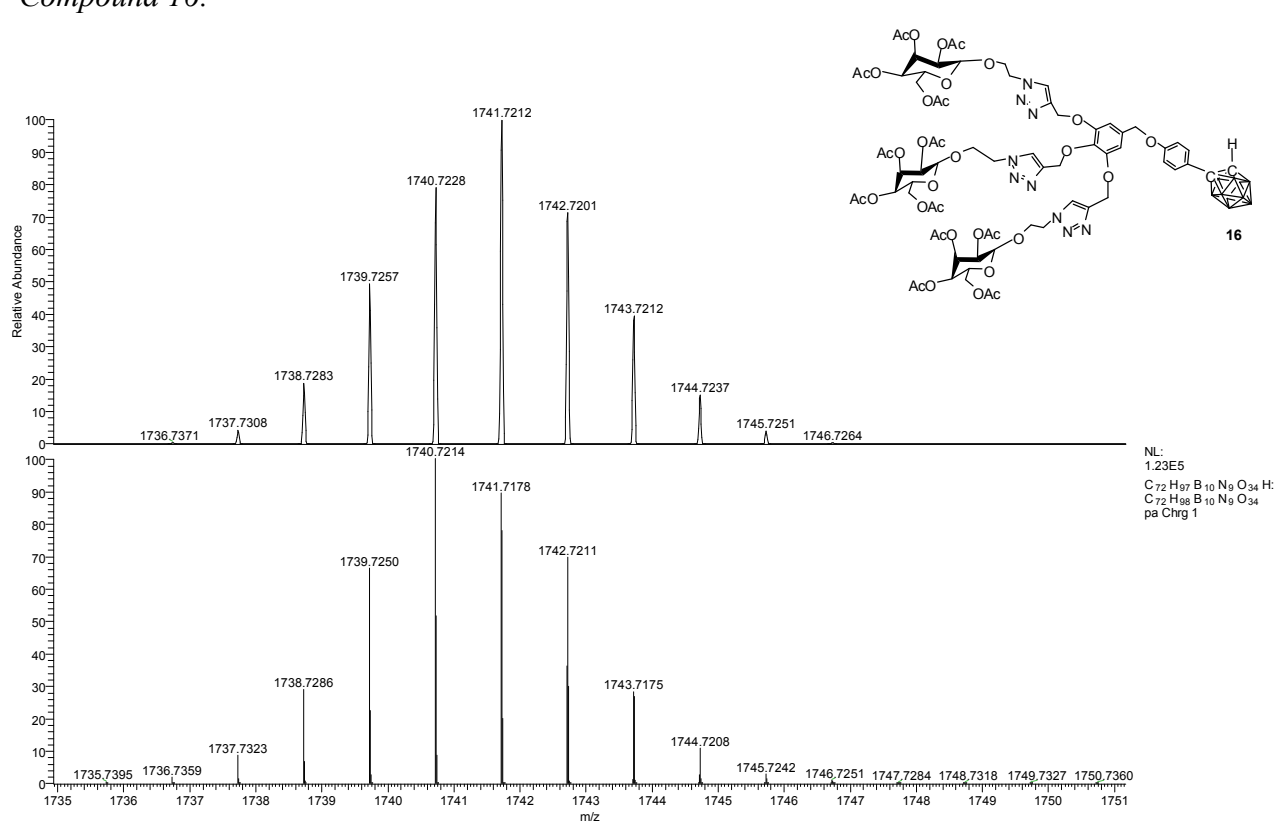

Compound 17:

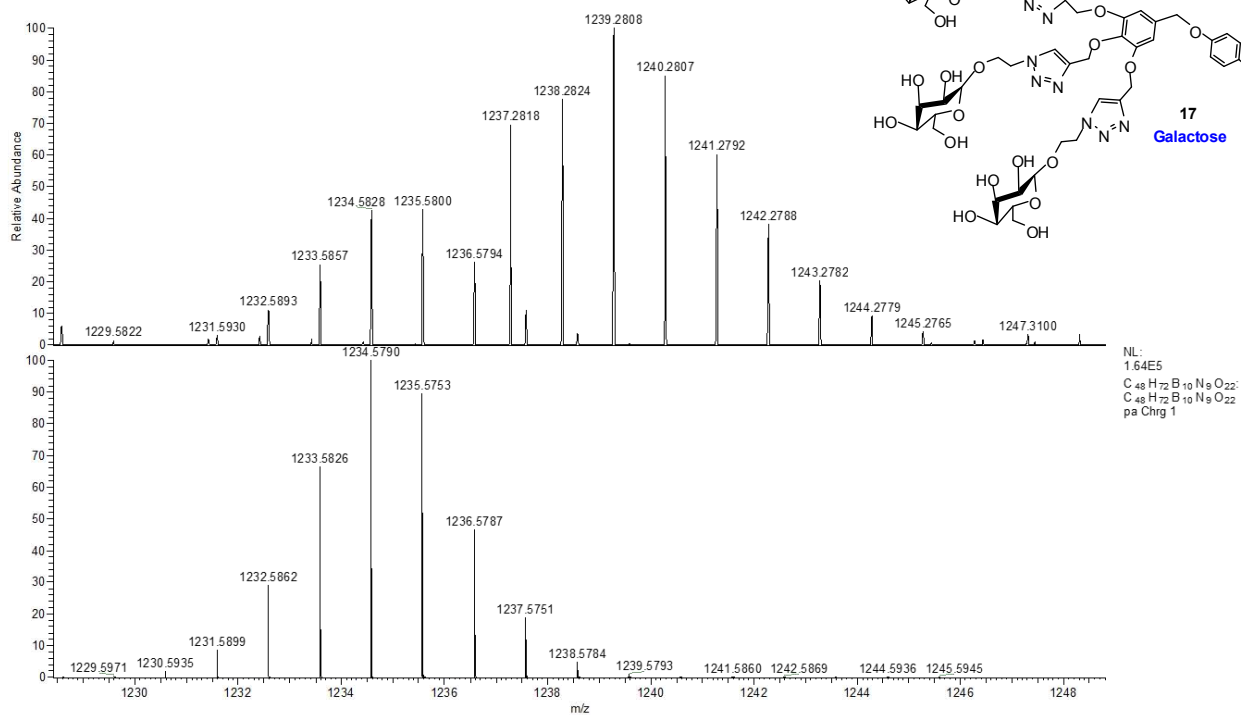

Compound 18:

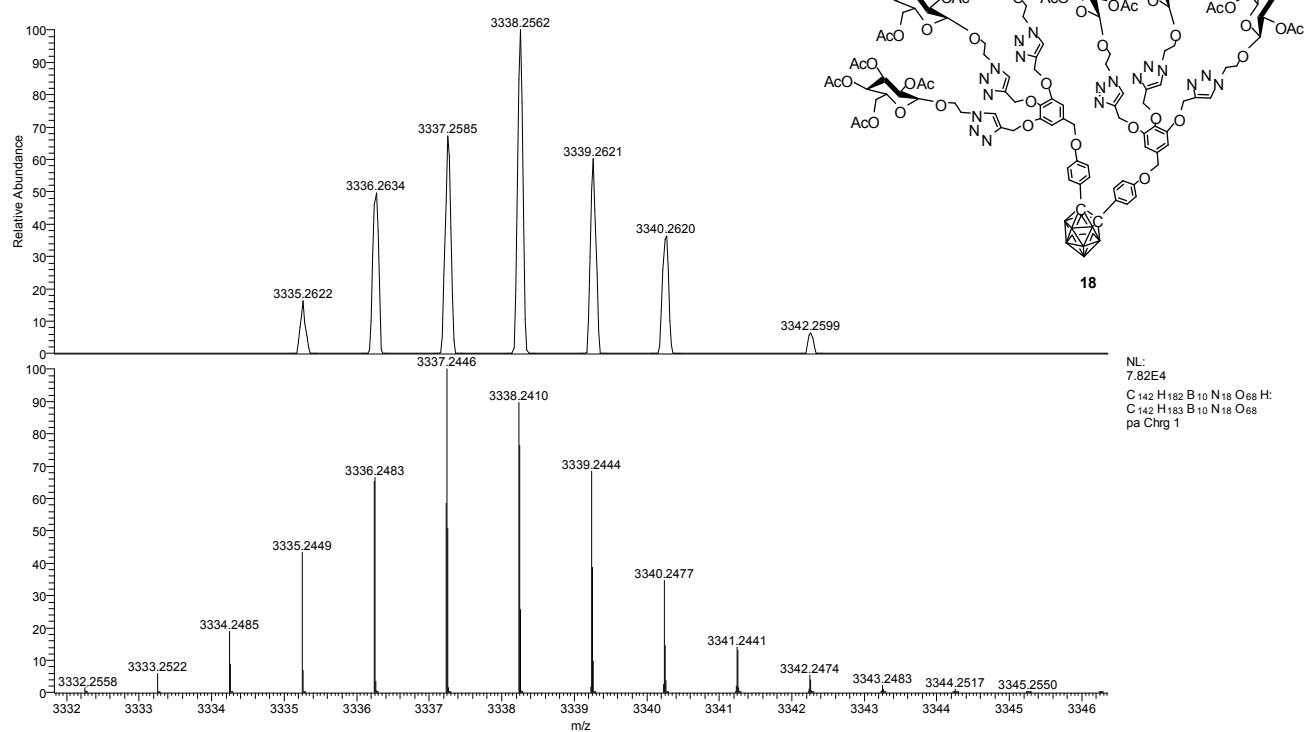

Compound 19:

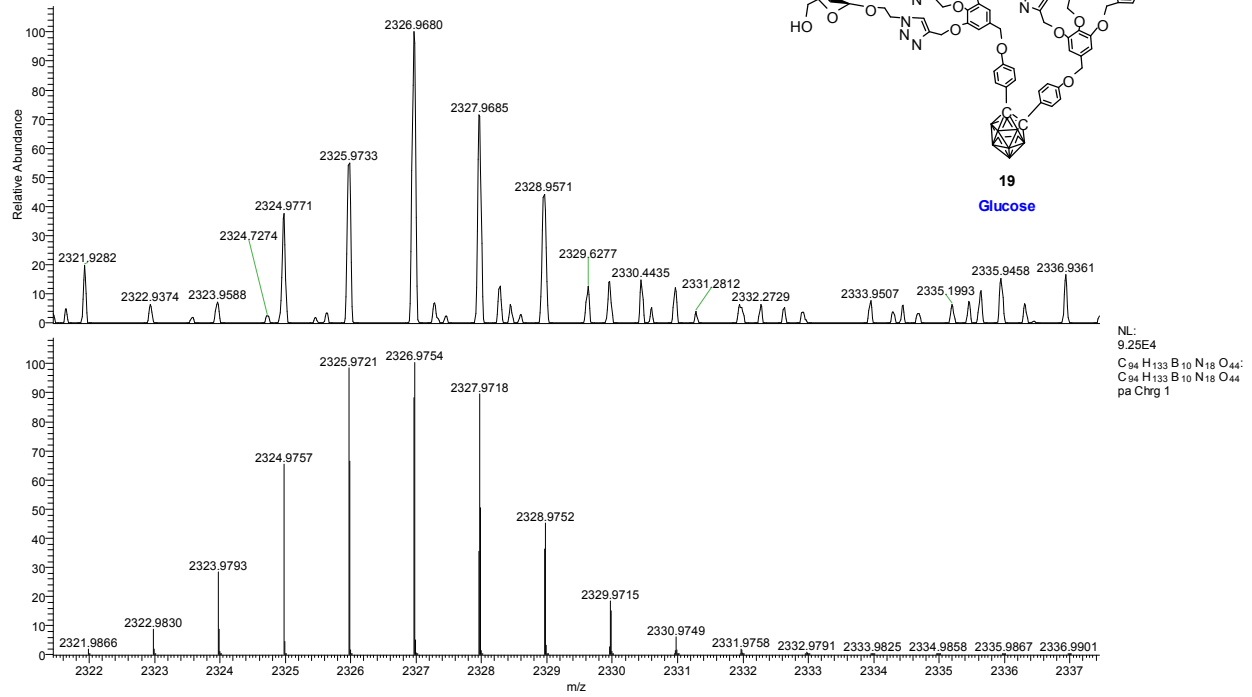

Compound 20:

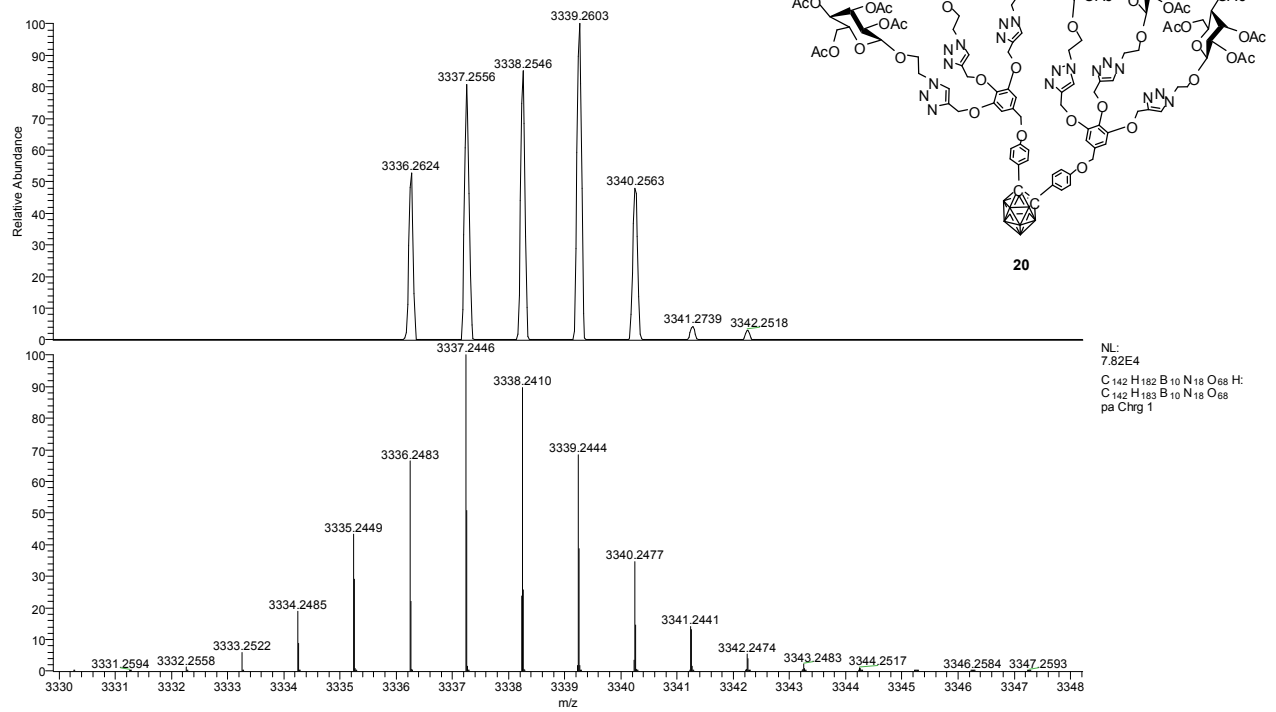

Compound 21:

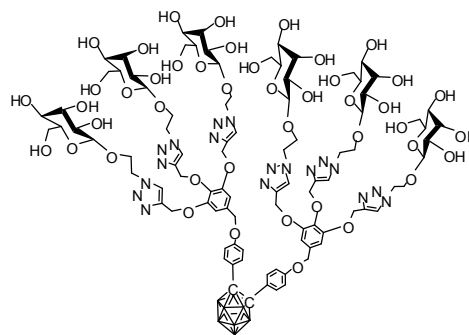

21  
Galactose

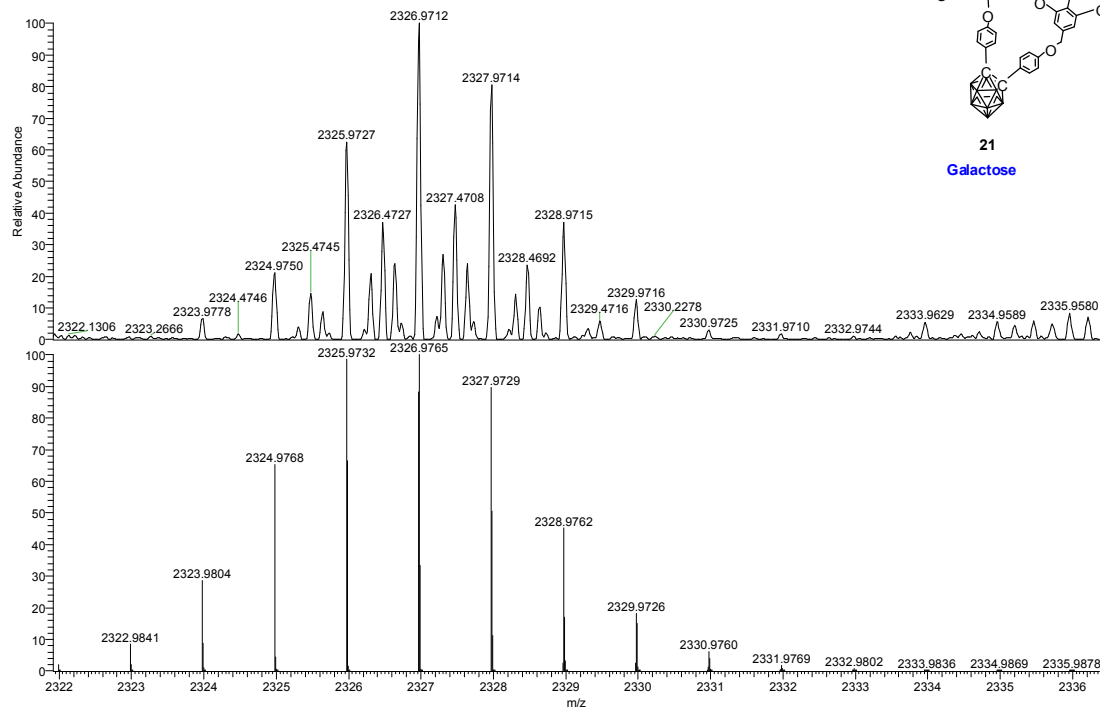

Supplement: d0ra07264h1.pdf [file d0ra07264h1.pdf]
